## Cell type diversity in a developing octopus brain

Ruth Styfhals<sup>1,2</sup>, Grygoriy Zolotarov<sup>3</sup>, Gert Hulselmans<sup>4,5</sup>, Katina I. Spanier<sup>4,5</sup>, Suresh Poovathingal<sup>5</sup>, Ali M. Elagoz<sup>1</sup>, Astrid Deryckere<sup>1†</sup>, Nikolaus Rajewsky<sup>3,6</sup>, Giovanna Ponte<sup>2</sup>, Graziano Fiorito<sup>2</sup>, Stein Aerts<sup>4,5</sup>, Eve Seuntjens<sup>1\*</sup>

<sup>1</sup> Laboratory of Developmental Neurobiology, Department of Biology, KU Leuven, Leuven, Belgium

<sup>2</sup> Department of Biology and Evolution of Marine Organisms, Stazione Zoologica Anton Dohrn, Naples, Italy

<sup>3</sup> Laboratory for Systems Biology of Gene Regulatory Elements, Berlin Institute for Systems Biology, Max Delbrück Center for Molecular Medicine in the Helmholtz Association, Hannoversche Str 28, 10707 Berlin, Germany

<sup>4</sup> Department of Human Genetics, KU Leuven, Leuven 3000, Belgium

<sup>5</sup> VIB Center for Brain & Disease Research, KU Leuven, Leuven 3000, Belgium

<sup>6</sup> Department of Pediatric Oncology/Hematology, Charité-Universitätsmedizin Berlin, Berlin, Germany

<sup>†</sup> Department of Biological Sciences, Columbia University, New York, United States

\* Corresponding author

## 26 Highlights & Key findings

27

- 28 • Characterization of different cell types present in the early paralarval brain
- 29 • Cross-species comparisons reveal a conserved glial gene expression signature
- 30 • Vertical lobe amacrine cells in octopus have molecular similarities to fly Kenyon cells
- 31 • Homeobox genes are defining transcription factors for cell type identity
- 32 • Recently expanded gene families may underlie cellular diversification

33

34

35

36

37

38

39

40

41

42

43

44

45

46

47 **Abstract**

48 Octopuses are mollusks that have evolved intricate neural systems comparable with vertebrates in terms  
49 of cell number, complexity and size. The cell types within the octopus brain that control their amazingly  
50 rich behavioral repertoire are still unknown. Here we profile cell diversity of the paralarval *Octopus*  
51 *vulgaris* brain to build a comprehensive cell type atlas that comprises mostly neural cells, as well as  
52 multiple glial subtypes, endothelial cells and fibroblasts. Moreover, we spatially map cell types within the  
53 octopus brain, including vertical and optic lobe cell types. Investigation of cell type conservation reveals a  
54 shared gene signature between glial cells of mice, fly and octopus. Genes related to learning and memory  
55 are enriched in vertical lobe cells, which show molecular similarities with Kenyon cells in *Drosophila*.  
56 Taken together, our data sheds light on cell type diversity and evolution of the complex octopus brain.

57

58

59

60

61

62

63

64

65

66

67

68

## 69 Introduction

70 Cephalopods, such as cuttlefish, squid and octopus, are enigmatic organisms that have evolved  
71 impressive cognitive capabilities. They can display a range of complex behaviors like problem-solving,  
72 tool use and millisecond camouflaging skills, for which higher cognitive functions are likely required<sup>1-4</sup>.  
73 Although the basic design of an octopus brain seems typically invertebrate-like, with neuropil surrounded  
74 by a layer of monopolar neuronal cell bodies, its anatomical complexity is unparalleled among  
75 invertebrates. Octopuses have a large centralized brain with more than 30 differentiated lobes and an  
76 intricate organization to support the transfer, integration and computation of information<sup>5,6</sup>.

77 The octopus brain consists of: (1) two optic lobes that are involved in visual sensory processing and  
78 memory storage of visual information, (2) the supraesophageal mass, a sensory-motor, associative and  
79 integrative center, which contributes to long-term memory storage and (3) the subesophageal mass,  
80 responsible for motor and visceral coordination and other sensory processing<sup>6</sup>. Even if it is generally  
81 accepted that complex brains and intelligence arose multiple times during evolution<sup>3,7,8</sup>, the necessary  
82 building principles to create complex brains remain unknown. Perhaps the most intriguing part of the  
83 octopus brain is the vertical lobe, with its 26 million neurons<sup>5</sup>. The vertical lobe has been posited to be the  
84 functional analog of the invertebrate mushroom body and the mammalian pallium<sup>9,10</sup>.

85 The central nervous system of an adult octopus consists of 200 million cells, which is comparable with the  
86 number of neurons in the brain of a tree shrew<sup>5,11</sup>. Although cell types present in the adult octopus brain  
87 have been extensively characterized morphologically by J.Z. Young<sup>6</sup>, the molecular signature of these cell  
88 types, and whether such a signature is similar to certain cells in the fly or mouse nervous system, remains  
89 unresolved.

90 Since the first octopus genome was published in 2015<sup>12</sup>, there has been increasing interest in cephalopod  
91 biology and neuroscience. This pivotal study highlights the expansion of gene families such as  
92 protocadherins (PCDH), G-protein coupled receptors (GPCR) and Zinc-finger transcription factors (ZnF)  
93 in *Octopus bimaculoides*<sup>12</sup>. These gene families have known roles in brain development and neural wiring  
94 in complex-brain species<sup>13-15</sup>. Whether these peculiar expansions have contributed to cell type diversity in  
95 octopus is unknown.

96 The common octopus, *Octopus vulgaris*, lays over ten thousands of transparent eggs, which take  
97 approximately one month to complete embryonic development and hatching<sup>16</sup>. At this point, the free  
98 swimming paralarvae undergo a planktonic phase before they adapt to a benthic lifestyle<sup>17</sup>. Their brain  
99 develops from the lateral lips - an embryonic neurogenic region surrounding the eyes - and contains all  
100 major lobes of the adult structure in miniature form<sup>18,19</sup>, see Fig. 1a-c. Upon hatching, the paralarval brain  
101 consists only of an estimated 200,000 cells<sup>20</sup> and it is about four times the size of the adult fruit fly brain,  
102 which makes it an attractive structure to build a cell type atlas. Since the development of single-cell RNA  
103 sequencing technologies, most studies have been model organism oriented. Indeed, studying cell type  
104 diversity in the absence of known cell type gene expression signatures poses additional challenges.

105 In this study, we report for the first time on cell type diversity in the *Octopus vulgaris* brain. Comparing  
106 and combining single-cell and single-nuclei datasets, we systematically characterize 42 cell types within  
107 the larval brain of *O. vulgaris* and provide the first description of their transcriptomes. We spatially map  
108 several of these cell types with *in situ* hybridization and use cross-species comparisons to predict  
109 conserved cell types and compare gene expression signatures. We provide evidence that several cell  
110 types display unique combinations of PCDH, ZnF or GPCR, suggesting that octopus-specific gene  
111 expansions contributed to increased cell type diversity. While we estimate the diversity of octopus brain  
112 cell types to be larger than our current view, our results are a valuable resource for future physiological  
113 studies and offer novel insights into the molecular profile of octopus brain cells and the evolution of cell  
114 types.

115

116

117

118

119

## 120 **Methods**

121

### 122 **Genome annotation**

123 The chromosomal scale genome assembly for *Octopus sinensis* was used (ASM634580v1)<sup>21</sup>. We  
124 extended the 3'-ends of the genes using an evidence-guided approach. First, full isoform-sequencing  
125 data (Iso-Seq, PacBio Sequel) was used to reconstruct mRNA isoforms (data retrieved from  
126 PRJNA718058, PRJNA791920). We included both paralarval<sup>18</sup> and adult<sup>22</sup> Iso-Seq datasets of *O.*  
127 *vulgaris*. For each gene, the end of the longest isoform was considered as the new 3'-end. Next, a full-  
128 length mRNA sequencing method - FLAM-seq - was used to locate mRNA cleavage sites in the  
129 genome<sup>22</sup>. Cleavage sites located within 60,000 bp were assigned to the closest upstream genes  
130 (PRJNA791920). Finally, to account for the genes missing in the FLAM-seq dataset, published short-read  
131 RNA-seq datasets<sup>23</sup> were used to extend the genes based on coverage. In brief, each gene was  
132 extended if there was sufficient continuous RNA-seq coverage ( $\geq 5$  reads) downstream. A schematic  
133 depiction of the pipeline is available in Fig. S1C. The resulting genome annotation is available in Data S1.  
134 This approach resulted in a twofold decrease in the number of the reads mapping to intergenic regions  
135 (Data S2). We manually curated the genome annotation for the PCDH gene family. Some read-through  
136 transcripts resulted in gene fusions and this was corrected by taking into account the number of protein  
137 domains. Transdecoder (<https://github.com/TransDecoder/>, v5.5.0) was used to identify the CDS.  
138 Functional annotation was performed by running BLAST+ v2.7.1 against the SwissProt protein databases  
139 of *Drosophila melanogaster*, *Mus musculus* and *O. bimaculoides* (with a e-value threshold of  $10^{-5}$ ). In  
140 addition, EggNOG-mapper v2<sup>24</sup> was used to infer orthologies to bilaterian genes. The results are  
141 summarized in Data S3. Gene ontology terms were also predicted by EggNOG and we calculated the  
142 enriched gene ontology terms for certain clusters with the GSEAPy package (v0.10.3).

### 143 **Animals**

144 *O. vulgaris* embryos were obtained from the Instituto Español de Oceanografía (IEO, Tenerife, Spain).  
145 Embryos were then incubated until hatching in a closed system in the Laboratory of Developmental  
146 Neurobiology (KU Leuven), Belgium<sup>16</sup>. One day after hatching, larvae were sedated with 2% ethanol

147 filtered artificial seawater. Next, 30 brains were dissected on ice for single cells and 30 brains for single  
148 nuclei in L15-medium (Sigma) with additional salts (214 mM NaCl, 26 mM MgSO<sub>4</sub>·7H<sub>2</sub>O, 4.6 mM KCl, 2.3  
149 mM NaHCO<sub>3</sub>, 28 mM MgCl<sub>2</sub>·6H<sub>2</sub>O, 0.2 mM L-glutamine, 38 mM D-glucose, 10 mM CaCl<sub>2</sub>·2H<sub>2</sub>O,  
150 pH=7.6). Statocysts and retinal tissues were removed as much as possible. All procedures involving  
151 hatchlings were covered by animal ethics permit P080/2021 and in accordance with the European  
152 guidelines for cephalopod research<sup>25</sup>.

### 153 **Immunohistochemistry and *in situ* hybridization**

154 One-day-old paralarvae were sedated in artificial seawater with 2% ethanol and fixed overnight in 4%  
155 paraformaldehyde (PFA) in phosphate buffered saline (PBS). Immunohistochemistry and *In situ*  
156 hybridization were performed as described before<sup>18</sup>. Briefly, embryos were embedded in paraffin after  
157 progressive dehydration and sectioned using a paraffin microtome (Thermo Scientific, Microm HM360) to  
158 obtain 6 µm-thick transversal sections. For immunohistochemistry, we used mouse anti-Acetylated alpha  
159 Tubulin (Sigma T6793) and rabbit anti-phospho-histone H3 (Ser10) (Millipore 06-570) as primary  
160 antibodies. Colorimetric *in situ* hybridization was performed using DIG-labeled antisense probes with the  
161 use of an automated platform (Ventana Discovery, Roche) with RiboMap fixation and BlueMap detection  
162 kits (Roche). The amount of probe used (100-300 ng) and incubation with BCIP/NBT (6-9 hours) was  
163 dependent on the target gene. Each probe was tested at least twice (different embryos and independent  
164 experiments). Probe sequences are listed in Data S6. Hybridization chain reaction (HCRv3.0) and  
165 imaging was performed as described before<sup>18</sup>. Probe sets were ordered for *Ov-glut*, *Ov-th*, *Ov-vacht*, *Ov-*  
166 *LOC118767670* and *Ov-apolpp* from Integrated DNA Technologies, Inc (Data S6). Probe sets were  
167 designed with the *insitu\_probe\_generator*<sup>26</sup> followed by automated blasting and formatting to minimize  
168 off-target hybridization with a custom script<sup>27</sup>. Imaging was done either with a Leica DM6 upright  
169 microscope (IHC, colorimetric ISH) or an Olympus confocal microscope Fluoview FV1000 (HCR).

### 170 **Single cell suspension**

171 Paralarval brains were enzymatically dissociated by adding 20 µl of Collagenase/Dispase (100 mg/ml,  
172 Roche) to 500 µl L15-adapted medium and incubating for two hours at 25°C, 500 rpm. Every 15 minutes,  
173 a P100 was used to pipet slowly up and down until the tissue was fully dissociated. After a 5 min

174 centrifugation step (200 rcf, 4°C), the supernatant was discarded and the pellet was resuspended in 1 ml  
175 of Mg-Ca-Free filtered sea water with 0.04% BSA (449 mM NaCl, 33 mM Na<sub>2</sub>SO<sub>4</sub>, 9 mM KCL, 2.15 mM  
176 NaHCO<sub>3</sub>, 10 mM Tris-Cl pH 8.2, 2.5 mM EGTA, filter sterilized). The cells were pulled through a strainer  
177 (35 µm) by a brief spin, followed by a wash with 400 µl Ca-Mg-Free filtered seawater. Cells were  
178 centrifuged again for 5 min (200 rcf, 4°C), supernatant was removed and the pellet was resuspended in  
179 100 µl Ca-Mg-Free filtered sea water with 0.04% BSA. The cell viability and concentration were assessed  
180 by the LUNA-FL Dual Fluorescence Cell Counter (Logos Biosystems). We obtained a single cell  
181 suspension with a multiplet cell percentage of 2.6%. Average cell size was 9.1 µm. The cell suspension  
182 was further diluted to reach appropriate cell counts, and a final viability of 84.9% was obtained before  
183 proceeding with 10X Genomics.

#### 184 **Single nuclei extraction**

185 The brains were immediately transferred to a dounce homogenizer (Sigma) containing 0.5 ml of ice-cold  
186 homogenization buffer (HB) (320 mM Sucrose, 5 mM CaCl<sub>2</sub>, 3 mM Mg(OAc)<sub>2</sub>, 10 mM Tris 7.8, 0.1 mM  
187 EDTA, 0.1% IGEPAL CA-360, 0.1 mM Phenylmethylsulfonyl fluoride, 1 mM β-mercaptoethanol with 5 µl  
188 RNasin Plus). Tissue was incubated in the HB for 5 min before starting homogenization. The tissue was  
189 homogenized with 10 manual gentle strokes (pestle A) + 10 manual gentle strokes (pestle B). The tissue  
190 homogenate was filtered through a 70 µm cell mesh strainer. Leftover contents on the strainer were  
191 washed with an additional 0.5 ml HB buffer. The homogenized tissue was incubated in HB on ice for 5  
192 min. Leftover contents on the strainer were washed with an additional 1.65 ml HB, which added to a final  
193 volume of 2.65 ml. The nuclei homogenate in the HB was mixed with 2.65 ml of Gradient Medium (GM) (5  
194 mM CaCl<sub>2</sub>, 50% Optiprep, 3 mM Mg(OAc)<sub>2</sub>, 10 mM Tris 7.8, 0.1 mM Phenylmethylsulfonyl fluoride, 1 mM  
195 β-mercaptoethanol). 29% density cushion was prepared by dilution of Optiprep with Optiprep Diluent  
196 Medium (150 mM KCl, 30 mM MgCl<sub>2</sub>, 60 mM Tris pH 8.0, 250 mM sucrose). The nuclei suspension in the  
197 HB + GM mix was layered over the 29% cushion and centrifuged in an SW41Ti rotor (Beckman Coulter)  
198 at 7700 rpm and 4°C for 30 min. The supernatant was removed with a Pasteur pipette, and the removal of  
199 the lower supernatant was done with a P200. The nuclei pellet was resuspended in 50 µl Resuspension



200 Buffer (PBS, 1% BSA) and transferred to a new tube. The resuspended nuclei were counted using a  
201 LUNA-FL Dual Fluorescence Cell Counter (Logos Biosystems).

## 202 **10X Genomics**

203 Library preparations for the sc/snRNA-seq experiments were performed using 10X Genomics Chromium  
204 Single Cell 3' Kit, v3 chemistry (10X Genomics, Pleasanton, CA, USA). We aimed for a targeted cell  
205 recovery of 6000-10,000 cells/nuclei. Post cell count and QC, the samples were immediately loaded onto  
206 the Chromium Controller. Single cell or single nuclei RNA-seq libraries were prepared using  
207 manufacturers recommendations (Single cell 3' reagent kits v3.1 user guide; CG000204 Rev D), and at  
208 the different check points the library quality was assessed using Qubit (ThermoFisher) and Bioanalyzer  
209 (Agilent). With a targeted sequencing coverage of 25-50 K reads per cell, single cell libraries were  
210 sequenced on Illumina's NovaSeq 6000 platform (VIB nucleomics core, KU Leuven) using paired-end  
211 sequencing workflow and with recommended 10X; v3.1 read parameters (28-8-0-91 cycles). A total of  
212 202,402,758 reads were obtained for the nuclei and 247,457,191 reads for the cells.

## 213 **10x Data preprocessing**

214 All samples were processed with 10x Genomics Cell Ranger 5.0.1 for mapping, barcode assignment and  
215 counting. Introns were retained and the parameter `--expected cells` was set at 8000 for both samples.  
216 Sequencing metrics for both samples can be found in Data S2. The 3'- end extended genome annotation  
217 described above was used as a reference (Data S1). This resulted in a raw dataset of 20,957 genes by  
218 14,265 cells for the single cells and 21,073 genes by 8910 cells for the single nuclei. Filtering and  
219 subsetting steps were done in Seurat v3.2.3<sup>28</sup>. Nuclei and cells with too high (>4000) or too low (<400 for  
220 nuclei, <800 for cells) gene counts were filtered out. Cells with a higher percentage (>5) of mitochondrial  
221 RNA were regressed out. Genes expressed in less than 10 cells were excluded. The SCTransform  
222 scaling method was used and data integration of the cells and nuclei was done following the  
223 recommended Seurat vignette. This resulted in a filtered integrated dataset of 17,961 genes by 17,081  
224 cells.

225

## 226 **Cluster annotation**

227 The package scclusteval was used to assess optimal clustering parameters to obtain the highest number  
228 of stable clusters<sup>29</sup>. By resampling and repeated clustering, we used the mean Jaccard indices as a  
229 metric for stability. Reclustering according to these optimal parameters (dims =150, k.param =10,  
230 resolution =2) resulted in the highest number of stable clusters. Cluster identities were transferred to the  
231 Seurat object. Differentially expressed genes were calculated for all clusters compared to all other  
232 clusters (logfc.threshold = 0.25). We used the package SCoPeLoomR  
233 (<https://github.com/aertslab/SCoPeLoomR>; v0.13.0) to generate the loom file, to facilitate data exploration  
234 in SCoPe. The expression levels of the genes in the t-SNE plots are Log transformed and visualized with  
235 a scale bar. For cluster annotation purposes we filtered out all unstable clusters (<0.6 Jaccard index) and  
236 discarded the clusters that were not well defined (clusters 58,0,12,17,48,8). Cluster 3 and cluster 15 were  
237 merged into IGL2-GLUT/DOP. These two clusters largely overlapped and did not have many differentially  
238 expressed genes. We attributed this to a batch effect of the nuclei and cells. This resulted in a dataset of  
239 42 robust clusters. Cell type annotation was based on the expression of vertebrate and invertebrate  
240 marker genes. Cell types were named based on their spatial localization and/or their  
241 neurotransmitter/neuropeptide phenotypes (Data S4). We used the PrctCellExpringGene function to  
242 calculate the % of cells that expresses a certain gene (number of cells with raw counts > 0).

## 243 **Transcription factors and cell type specificity**

244 Transcription factors (TF) were annotated with animalTFDB<sup>30</sup>. Gene expression was averaged per cell  
245 type based on the SCT assay and genes expressed in less than 20 cells were excluded. The  
246 ComplexHeatmap R package was used for data visualization (Fig. 6). We calculated the tau value for all  
247 transcription factors using the tspex Python package (v0.6.2). We then calculated whether a transcription  
248 family was enriched within the rank of tau (GSEAPy, v0.10.3).

## 249 **Cross-species cell type comparison**

250 SAMap v0.1.6<sup>31</sup> was used to compare our data to scRNA-seq datasets of different species to gain more  
251 information about the identity and evolution of the octopus cell types. We mapped the octopus paralarval

252 brain to a mouse brain dataset <sup>32</sup> and to the adult fly brain<sup>33</sup>. Only alignment scores above 0.25 were  
253 considered to be of significance. Resulting annotations were visualized on the octopus t-SNE plot (Fig. 4)  
254 and listed in Data S4.

### 255 **Gene family enrichment analysis**

256 Fisher's exact test was performed to calculate statistical enrichment for these recently expanded gene  
257 families such as PCDH, C2H2- ZnF and GPCR. Contingency tables were constructed and we then  
258 compared the number of genes belonging to a certain gene family to all other genes present in that cell  
259 type versus all other cell types. Only genes with an avg\_logFC of above 0.25 or below -0.25 were  
260 considered for this analysis (75 PCDHs, 141 C2H2-ZnF and 130 GPCRs). Fisher's exact tests for each  
261 cell type were followed by a bonferroni correction for multiple testing with p.adjust() in R studio.  
262 Expression of octopus-specific genes was averaged per cell type based on the SCT assay and visualized  
263 on a scaled heatmap (Fig. S9). The ComplexHeatmap R package was used for data visualization and  
264 significant enrichments were highlighted in red (Fig. S9).

265

266

267

268

269

270

271

272

## 273 Results

### 274 Generation of a single-cell and single-nucleus transcriptome atlas

275 To comprehensively study cellular diversity in the octopus brain, we performed 10x Genomics on single  
276 cells and single nuclei from dissected brains of one-day-old *O. vulgaris* paralarvae (Fig. 1a). The octopus  
277 hatchling brain possesses about 200,000 cells and consists of two optic lobes (ol), the supraesophageal  
278 mass (sem) and subesophageal mass (sub) that surround the esophagus (Fig. 1b-c). We dissociated the  
279 brains to create a single cell suspension for single-cell RNA sequencing and extracted nuclei for single-  
280 nuclei RNA sequencing (Fig. 1d, see also Methods).

281 As the draft genome of *O. vulgaris* was too fragmentary for annotation<sup>34</sup>, we mapped the reads to the  
282 chromosomal scale genome assembly for *O. sinensis*, a very closely related species to *O. vulgaris*<sup>21</sup>.  
283 Furthermore, to optimize the accuracy of gene expression counts, we created an improved gene  
284 annotation. Since the single-cell RNA-seq method used here is biased towards 3' ends of messenger  
285 RNAs, we focused on the 3' UTR annotation (Fig. S1). Particularly, we used FLAM-seq<sup>35</sup> and Iso-Seq  
286 (PacBio) full-length mRNA sequencing data of embryonic, paralarval and adult octopus tissue (Fig. S1,  
287 Data S1)<sup>18,22</sup>. With this new annotation, the percentage of reads that mapped confidently to the  
288 transcriptome increased significantly (from 32.5% to 45.6% for the nuclei and from 49.4% to 58.8% for the  
289 cells; Data S2). We obtained 8517 nuclei and 8564 cells that passed QC thresholds (on gene counts and  
290 mitochondrial reads, see Methods). The median number of genes detected was 1351 and 1506 for nuclei  
291 and cells, respectively. After batch effect correction, we combined these cells and nuclei into a single  
292 dataset containing 17,081 high quality transcriptomes.

293 Clustering parameters such as the number of principal components used, k-nearest neighbor and cluster  
294 resolution resulted in different numbers of clusters and cluster sizes. Since previous knowledge on the  
295 expected number of cell types or their molecular markers was virtually nonexistent, we assigned a  
296 stability value to each cluster in order to detect meaningful cell types (Fig. S2b)<sup>29</sup>. By subsampling and  
297 reclustering the dataset, we identified the optimal clustering parameters that resulted in the highest  
298 number of stable clusters. This resulted in 42 distinct stable clusters, which we presume related to bona  
299 fide cell types (Fig. 1e). Almost all the clusters contained data points from both cells and nuclei

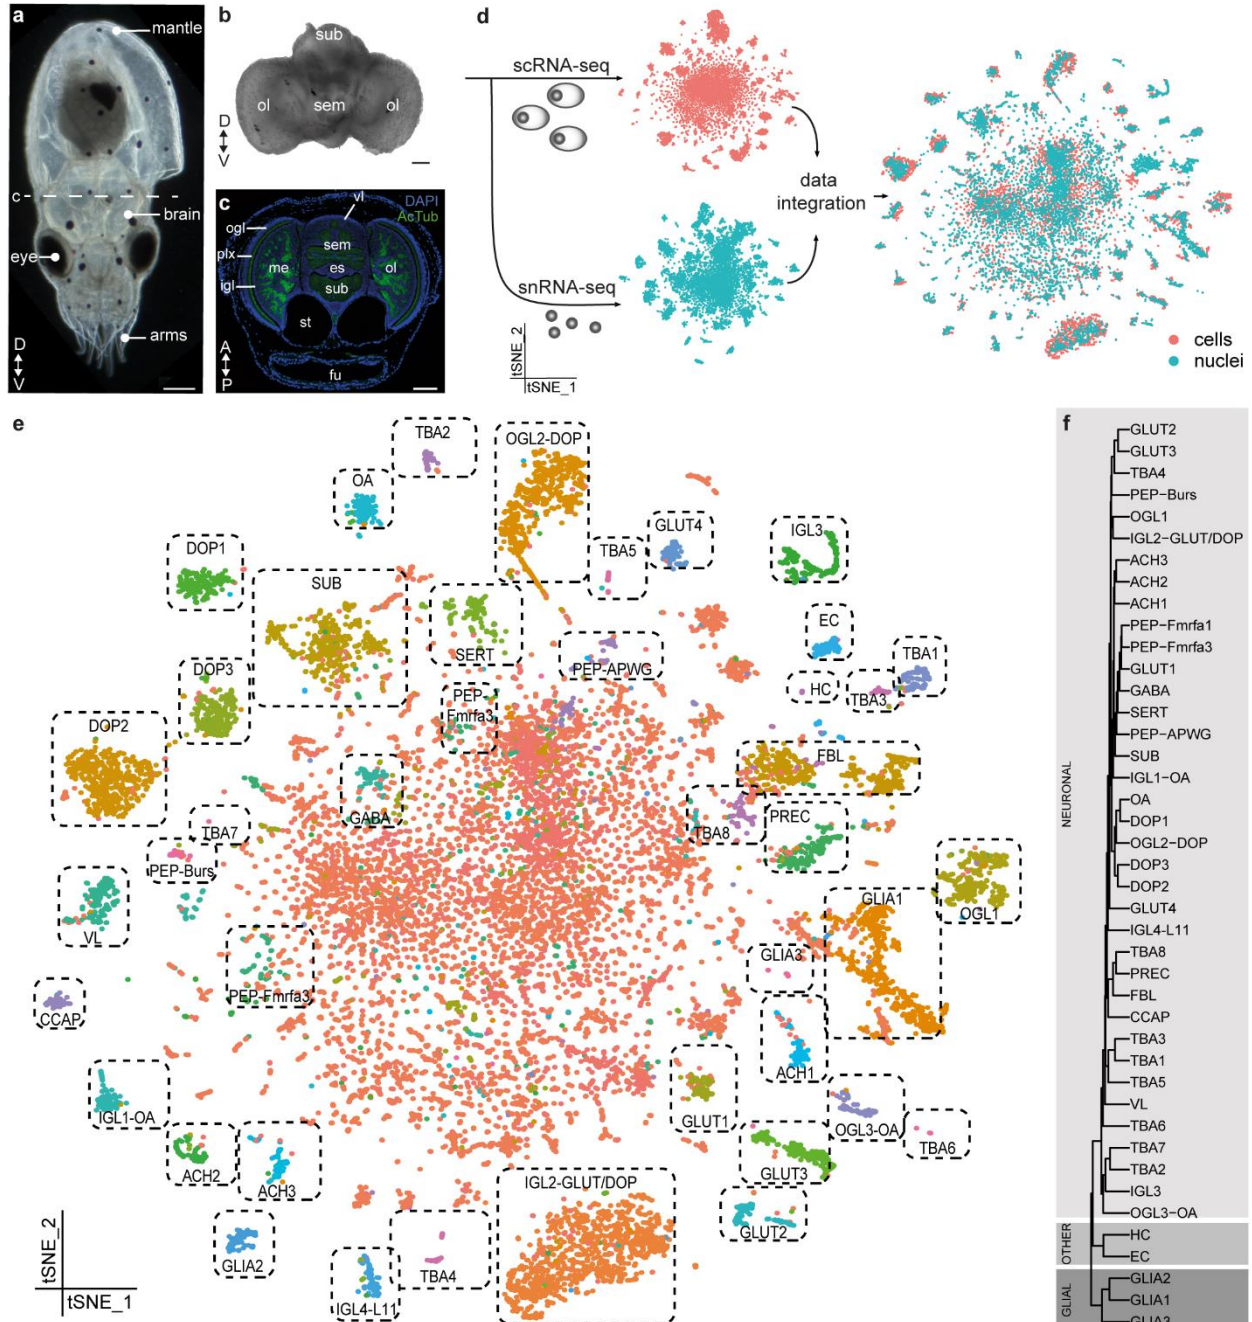

300 **Fig. 1 Cellular diversity in the developing octopus brain.** **a** One-day-old *Octopus vulgaris* paralarva. Dashed line indicates the  
 301 sectioning plane in **c**. **b** Dissected brain. **c** Representative transversal section of a larva with annotated anatomical structures. **d**  
 302 Experimental design of this study. Single cell and nuclei RNA sequencing was performed with 10x Genomics and data integration  
 303 resulted in a filtered dataset of 17,081 high quality cells. **e** t-SNE representation of the integrated sc and snRNA-seq data.  
 304 Annotated cell types are labeled. **f** Hierarchical clustering of all stable clusters. All scale bars represent 100  $\mu$ m. A, anterior; ACH,  
 305 cholinergic neurons; AcTub, acetylated tubulin; CCAP, cardioactive peptide cells; DOP, dopaminergic neurons; D, dorsal; EC,  
 306 endothelial cells; es, esophagus; FBL, fibroblasts; fu, funnel; GABA, GABAergic neurons; GLUT, glutamatergic neurons; HC,  
 307 hemocytes; igl, inner granular layer; IGL, inner granular layer cells; me, medulla; OA, octopaminergic neurons; ogl, outer granular  
 308 layer; OGL, outer granular layer cells; ol, optic lobe; P, posterior; PEP, peptidergic neurons; plx, plexiform layer; sem,  
 309 supraesophageal mass; SERT, serotonergic neurons; sub, subesophageal mass; SUB, subesophageal neurons; st, statocysts;  
 310 TBA, to be annotated; V, ventral; vl, vertical lobe; VL, vertical lobe cells.

311 (Fig S2c). To allow further exploration of this atlas by the community, we made it available as a portal in  
312 SCoPe ([https://scope.aertslab.org/#/Octopus\\_Brain/](https://scope.aertslab.org/#/Octopus_Brain/)). In the following sections, we will describe  
313 several of these clusters in more detail, based on their spatial localization and/or expression of marker  
314 genes.

### 315 Cluster annotation based on neurotransmitter and peptide expression

316 The majority of cells present in the octopus brain were neurons (89% *elav+*, 83% *onecut+*, Fig. S3a, Fig.  
317 1f). A hierarchical clustering based on the transcriptomes of all stable clusters resulted in three main  
318 branches: neuronal, glial and other (hemocytes and endothelial cells; Fig. 1f). Several neuron types  
319 strongly exhibited a particular neurotransmitter or a peptidergic phenotype and were annotated  
320 accordingly, making use of gene homologs of fly and/or mouse (Fig. 2a). The paralarval brain was mostly  
321 glutamatergic (64% *vglut+*) and cholinergic (29% *vacht+*), but we also found four prominent dopaminergic  
322 clusters (27% of all cells are *th+*) (Fig. 2b). We observed that different cholinergic (ACH) and  
323 dopaminergic (DOP) neuronal clusters group together (fig 1f), which suggests a common origin and/or a  
324 common transcriptional program. On the t-SNE plot, a large central cluster of neurons was visible that we  
325 could not assign to a stable cluster. These cells were of high quality and could be divided in a cholinergic  
326 and glutamatergic population (Fig. 2b, fig S2d). The observation of such a central unstable cluster in the t-  
327 SNE was similar to what was seen in the *Drosophila* brain atlas<sup>33</sup>. A large set of neurons could not be  
328 clustered into distinct cell types in the fly brain, either, which may point to a large number of neuronal  
329 subtypes each with a small number of cells. Conversely, larger stable clusters likely represented more  
330 prevalent cell types.

331 In order to spatially locate cell types within the brain, we proceeded with *in situ* hybridization for highly  
332 expressed genes related to neurotransmitter synthesis or transport and genes encoding peptides (Fig. 2c-  
333 e). We identified a common dual-transmitter cell type, which is both dopaminergic and glutamatergic (Fig.  
334 2b,d). *In situ* HCR showed that this cell type was prevalent in the inner granular layer (igl) of the optic lobe  
335 (IGL2-GLUT/DOP).

336

337

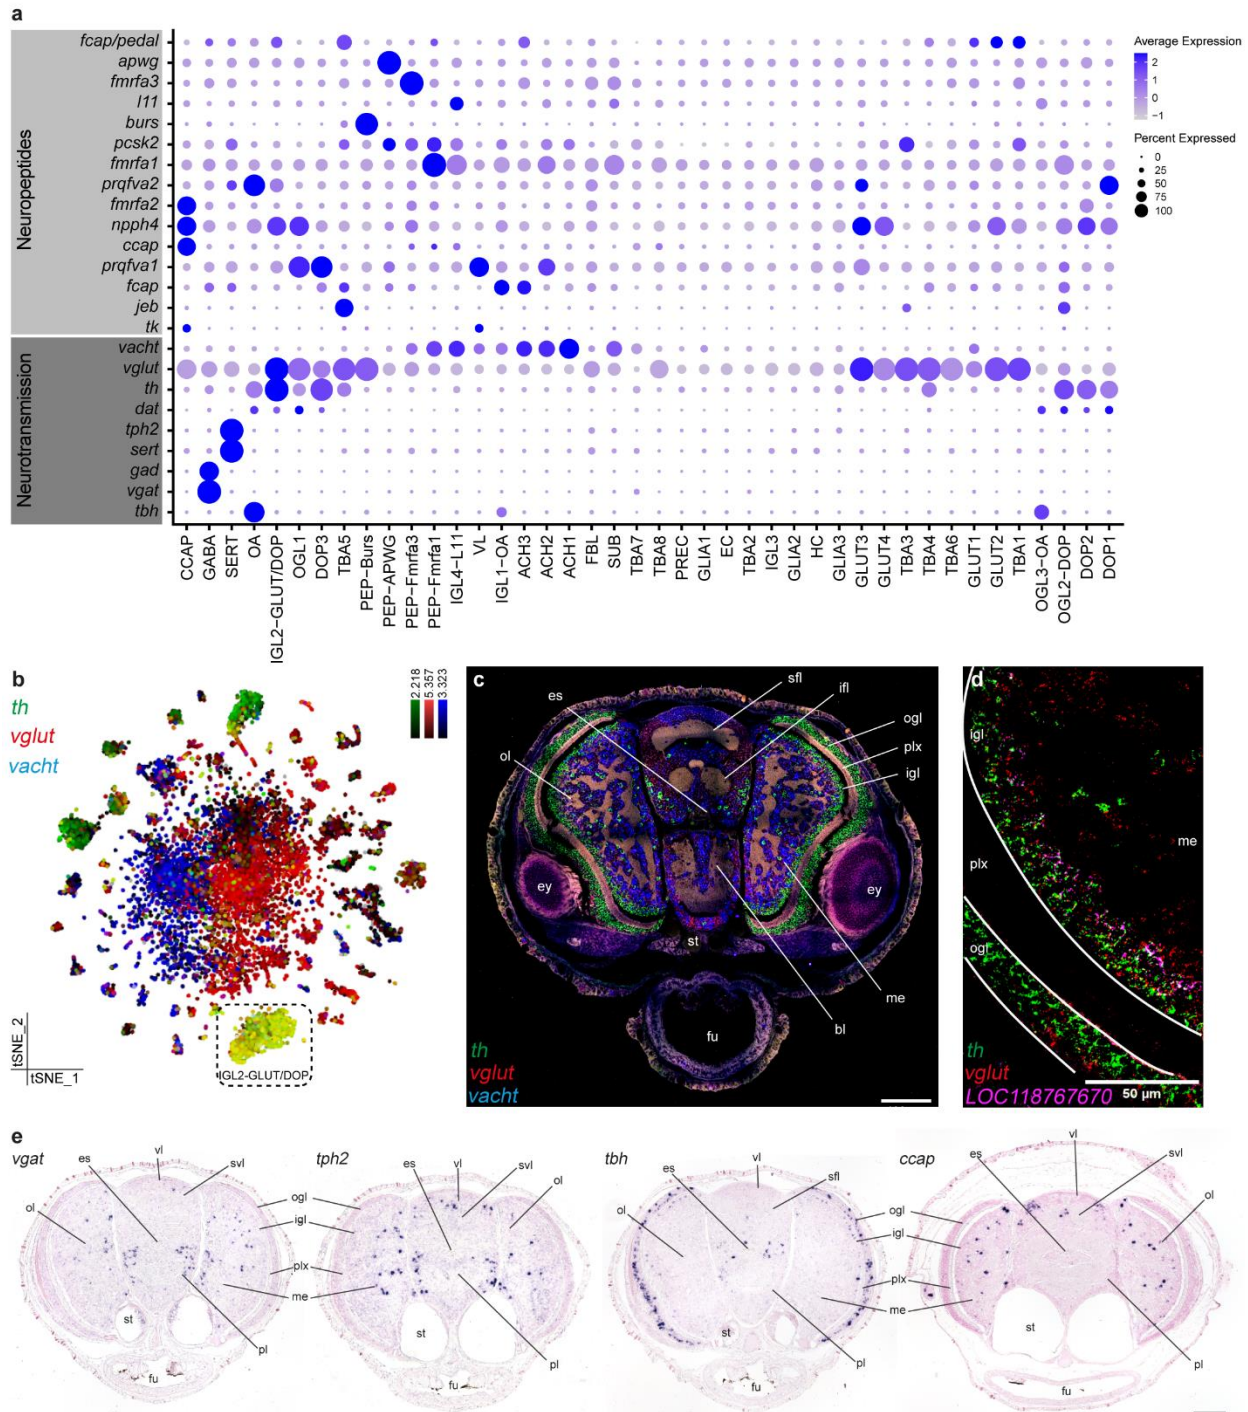

338 **Fig. 2 Neurotransmitters and peptides.** **a** Dotplot for main neuropeptides and genes involved in the synthesis and transport of  
 339 neurotransmitters. **b** Expression of *th*, *vglut* and *vacht* is visualized on a t-SNE plot. *Th* (tyrosine hydroxylase) is shown in green,  
 340 *vglut* (vesicular glutamate transporter) in red and *vacht* (vesicular acetylcholine transporter) in blue. **c** Multiplexed *in situ*  
 341 hybridization chain reaction (HCR) for *th*, *vglut* and *vacht*. **d** Co-expression of *th* and *vglut* in the inner granular layer of the optic  
 342 lobe, together with the cluster specific marker for IGL2-GLUT/DOP; *LOC118767670*. **e** *In situ* hybridization for *vgat* (vesicular GABA  
 343 transporter, GABAergic neurons), *tph2* (tryptophan hydroxylase 2, serotonergic neurons), *tbh* (Tyramine  $\beta$ -hydroxylase,  
 344 octopaminergic neurons) and the neuropeptide *ccap* (Crustacean cardioactive peptide). Scale bars represent 100  $\mu$ m for the  
 345 overview images. bl, brachial lobe; es, esophagus; ey, eye; fu, funnel; igl, inner granular layer; ifl, inferior frontal lobe; me, medulla;  
 346 ogl, outer granular layer; ol, optic lobe; pl, pedal lobe; plx, plexiform layer; sfl, superior frontal lobe; st, statocysts; svl, subvertical  
 347 lobe; vl, vertical lobe.

348 GABAergic (*gad+*, *vgat+*; GABA) and serotonergic (*sert+*, *tph2+*; SERT) neurons comprised smaller  
349 populations that were located throughout the medulla of the optic lobe and the central brain (Fig. 2e).  
350 Three octopaminergic cell types (OA) expressed the synthesizing enzyme *tbh* and could be distinguished  
351 based on their spatial localization (Fig. 2e); outer granular layer (OGL3-OA), inner granular layer (IGL1-  
352 OA) and central brain (OA). We could not identify any tyraminergetic, glycinergic or (nor)adrenergic  
353 neurons. The majority of neurons expressed one or more neuropeptides, in addition to a neurotransmitter  
354 (e.g., OA; *tbh* and *prqfva2*). In contrast, some clusters did not have a clear neurotransmitter phenotype  
355 but did express a prominent neuropeptide, for instance *fmrfa3* (PEP-Fmrfa3) and *ccap* (CCAP) (Fig. 2e).  
356 We also identified a cholinergic cell type (SUB) that was dedicated to the subesophageal mass. These  
357 neurons (Fig. 2c, Fig. S4) produced the neuropeptide *l11* and *shh* and were organized in groups of large  
358 cells within the sub. This cell type appeared intercalated with glutamatergic neurons (Fig. 2c).

### 359 Molecular lamination within the deep retina

360 The optic lobe already contained a large cellular diversity at hatching. We further investigated whether  
361 neuronal subtypes were spatially confined or distributed by mapping subtype-specific marker genes. We  
362 found three distinct cell types within the outer granular layer (ogl) of the optic lobe (Fig. 3a,c,e,g, OGL1,  
363 *ppp1+*; OGL2-DOP, *jeb+*; OGL3-OA, *pcdh24+*). The majority of cells in the ogl were small dopaminergic  
364 neurons (OGL2-DOP). Cells in the OGL2-DOP cluster expressed *jeb* and *dscam* at different levels, which  
365 we confirmed using *in situ* hybridization (Fig. S5). *dscam+* cells were located more towards the interior of  
366 the layer while *jeb+* cells were positioned more externally (Fig. S5). Cell bodies of a second cell type  
367 (OGL1) seemed slightly larger than the dopaminergic cells and were mainly glutamatergic but also  
368 synthesized some dopamine. Lastly, the largest cell bodies we identified were octopaminergic (OGL3-  
369 OA). These octopaminergic neurons were a lot less prevalent than OGL1 and OGL2-DOP.

370 Furthermore, we observed multiple cell types within the inner granular layer (igl) of the optic lobe (Fig.  
371 3b,d,f,h). Large *egfr+* cells (IGL1-OA) were located externally, next to the plexiform layer, while *stard5+*

372  
373  
374



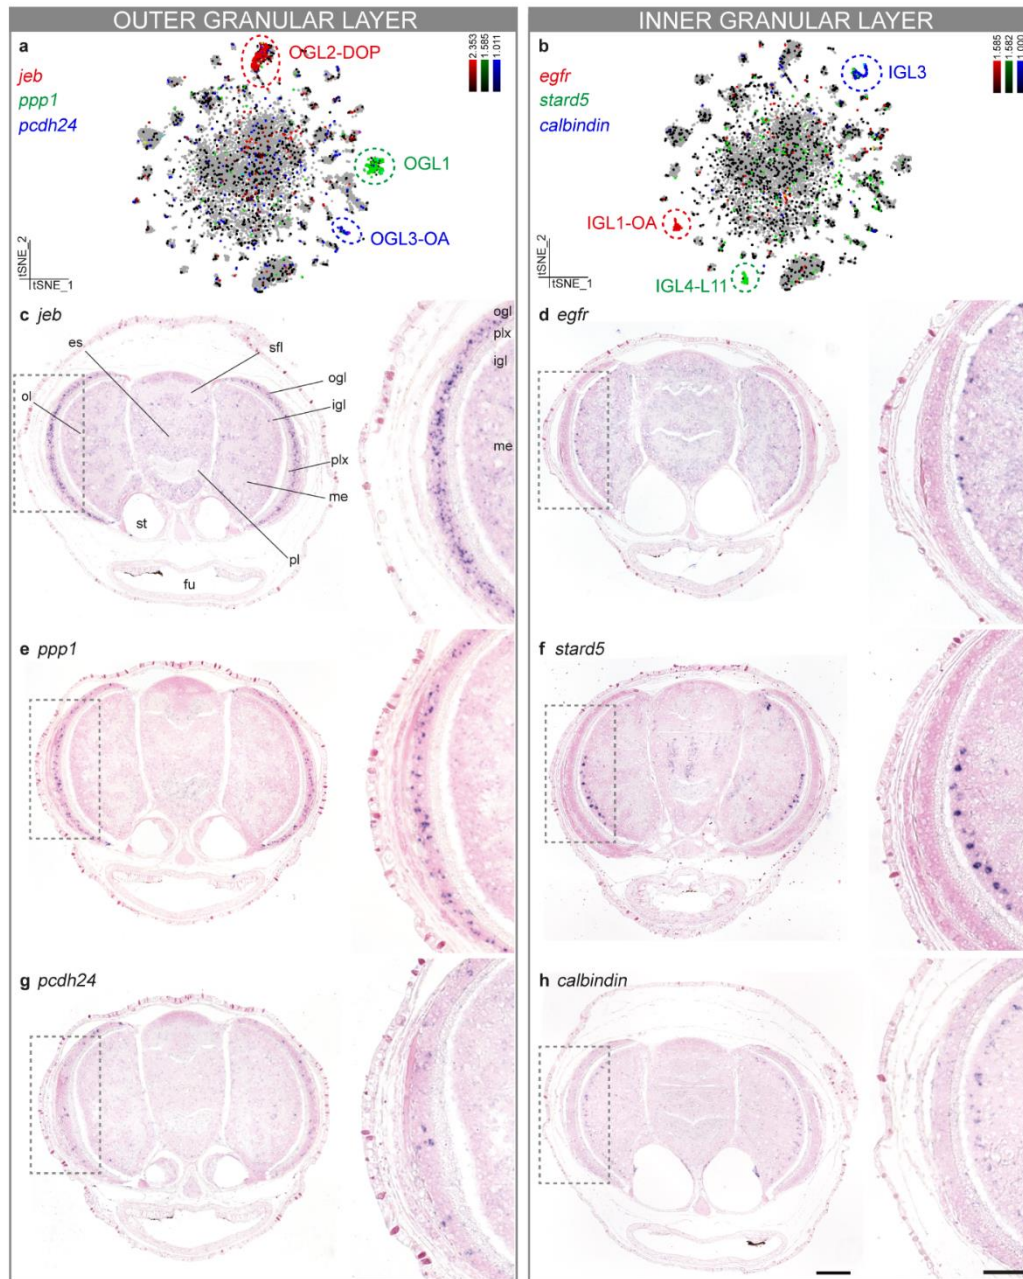

397 **Fig. 3 Optic lobe cell type diversity.** **a** t-SNE representation of three different cell types (OGL1, OGL2-DOP, OGL3-OA) of the  
 398 outer granular layer. Marker genes for these three populations are plotted. *In situ* hybridization for these marker genes are shown in  
 399 c, e, g. **b** t-SNE representation of three cell types of the inner granular layer (IGL1-OA, IGL3 and IGL4-L11). Marker genes for these  
 400 three populations are plotted. *In situ* hybridization for these marker genes are shown in d, f, h. **c** Neuropeptide *jeb* is expressed  
 401 throughout the ogl in dopaminergic neurons. **d** Epidermal growth factor receptor (*egfr*) is expressed in octopaminergic neurons in  
 402 the most outer region of the igl. **e** Protein phosphatase 1 (*ppp1*) is expressed within the ogl, although present in fewer cells than *jeb*.  
 403 **f** StAR Related Lipid Transfer Domain containing 5 (*stard5*) is expressed within the igl, more interiorly than the *egfr*+ cell type. **g**  
 404 *pcdh24* is expressed in octopaminergic neurons present in the ogl. **h** *calbindin* is expressed in the most interior side of the igl.  
 405 Magnified regions are annotated with a grey box. Scale bars for the overview images represent 100  $\mu$ m and for the magnifications  
 406 50  $\mu$ m. es, esophagus; fu, funnel; igl, inner granular layer; me, medulla; ogl, outer granular layer; ol, optic lobe; pl, pedal lobe; plx,  
 407 plexiform layer; sfl, superior frontal lobe; st, statocysts.

408 cells (IGL4-L11) and *calbindin*<sup>+</sup> cells (IGL3) were organized in layers more towards the medulla.  
409 Intriguingly, IGL3 cells did not synthesize any prominent neurotransmitter or neuropeptide. A fourth igl  
410 population, marked by the uncharacterized gene *LOC118767670* (Fig. 2d), was both glutamatergic and  
411 dopaminergic (IGL2-GLUT/DOP). The laminated appearance of molecularly different cell types revealed  
412 an additional subdivision within the so-called “deep-retina” of octopus.

### 413 Cross-species cell type comparisons

414 In order to identify and annotate evolutionary conserved cell types, we performed comparisons between  
415 octopus, fly<sup>33</sup> and mouse<sup>32</sup> brain single-cell data sets using the SAMap algorithm<sup>31</sup> (Fig. 4a). Based on  
416 cross-species cell type mappings, we found that the octopus GLIA1 subtype is molecularly similar to fly  
417 ensheathing glia and mouse astrocytes, and GLIA3 to mouse telencephalic astrocytes (Fig. 4a). Based  
418 on this mapping we could also identify a conserved glial gene expression signature that is shared  
419 between these three species (Fig. 4b). Only around 10% of all cells in the octopus paralarval brain were  
420 identified as glia (*gs2*<sup>+</sup>), see Fig. 4c. Both *gs2* and *apolpp* were highly expressed in all glial populations.  
421 In line with their function, we found that glial cells are located in the neuropil of the octopus brain (Fig. 4d-  
422 g). We then examined the expression of *apolpp* with *in situ* HCR at a higher magnification and were able  
423 to identify glial cells with multiple processes (Fig. 4e). Most *apolpp*<sup>+</sup> cells were located within the neuropil  
424 near the axons of the cells from the perikaryal layer, although some glial cells were infiltrating the cortex  
425 and were located between the neuronal cell bodies (Fig. 4f). We observed high expression of several  
426 invertebrate glial markers such as *CG6216*, *notch* and *eaat1* but no orthologues could be identified for  
427 genes used to discriminate between glial subtypes in flies (*indy*, *wrapper* and *alrm*)<sup>33,36</sup>. At least three  
428 distinct glial subtypes were identified within this dataset (GLIA1,2,3), suggesting there is also functional  
429 diversification within octopus glial cells. GLIA1 highly expressed *gat1* and *CG6126* while GLIA2 was  
430 characterized by *hhex* expression.

431 IGL2-GLUT/DOP was a prominent cell type within the octopus visual system and had a similar molecular  
432 profile to fly T1 neurons (e.g. *eaat1* and *gilt1*) (Fig.4a). It remains to be investigated whether IGL2-  
433 GLUT/DOP neurons are the amacrine cells that provide feedback from the igl to the plexiform layer,  
434 similar to the fly T1 neurons from the medulla to the lamina.

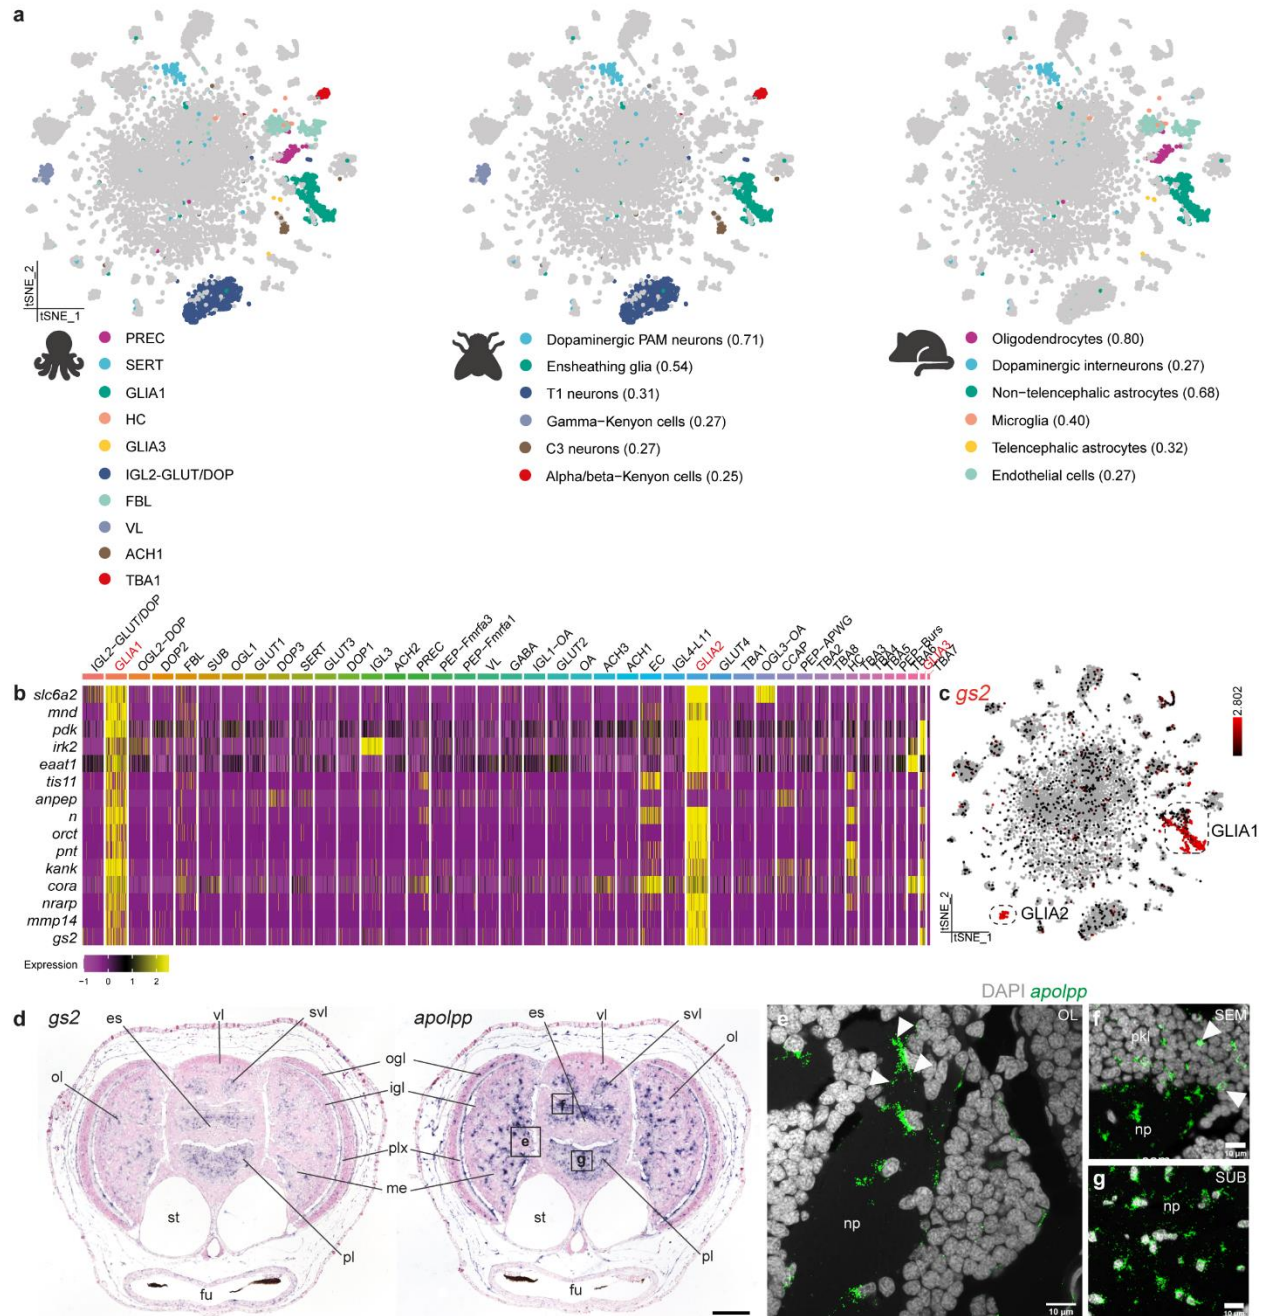

435 **Fig. 4 Cross species cell type comparisons identify a glial gene expression signature.** **a** Cell type mappings between octopus,  
 436 fly and mouse are represented on the t-SNE plot. Mappings are color coded and alignment scores are shown between brackets. **b**  
 437 Heatmap of the top 15 genes (filtered on specificity and fold change) from the mapping between octopus glia 1, fly ensheathing glia  
 438 and non-telencephalic astrocytes in the mouse brain. Glial populations are highlighted in red. **c** t-SNE representation of two main  
 439 glial populations in octopus based on the expression of *gs2* (Glutamine synthetase 2). **d** *In situ* hybridization of *gs2* and *apolpp*  
 440 (Apolipoprotein). Scale bar represents 100  $\mu$ m. Representative magnifications of different brain areas are annotated with black  
 441 boxes. Fluorescent *in situ* hybridization for *apolpp* are shown in e, f and g. **e** Glial cells in the optic lobe. White arrows indicate  
 442 multiple processes. **f** Glial cells in the supraesophageal mass. White arrows indicate infiltrating glia. **g** Glial cells in the  
 443 subesophageal mass. es, esophagus; fu, funnel; igl, inner granular layer; me, medulla; np, neuropil; ogl, outer granular layer; pkl,  
 444 perikaryal layer; ol, optic lobe; pl, pedal lobe; plx, plexiform layer; SEM, supraesophageal mass; st, statocysts; SUB, subesophageal  
 445 mass; svl, subvertical lobe; vl, vertical lobe.

446

447 SAMap also found similarities between octopus serotonergic neurons, fly dopaminergic PAM neurons and  
448 dopaminergic interneurons in mice (Fig.4a). In addition, fly lamina feedback C3 map to the octopus cell  
449 type ACH1. These findings suggest that some clusters might deploy deeply conserved transcriptional  
450 programs across bilaterian evolution.

451 Another interesting observation from the SAMap comparison was the similarity between octopus vertical  
452 lobe (VL) cells and fly gamma Kenyon cells (Fig. 4a). The VL cells were identified based on the  
453 expression of *aristalless* (*arx*), *camkII* and *tmtc4* (Fig. 5a). The adult *O. vulgaris* vl has five gyri, which  
454 consist out of 25 million small amacrine interneurons and 65,000 large neurons<sup>6</sup>. Although Frösh (1971)  
455 found that the relative volume of the vl was a lot smaller in hatchlings, the composition of the vl in the  
456 hatchling brain was not described<sup>19</sup>. We showed that the hatchling vl possesses 3-2 gyri along the  
457 dorsoventral axis and is composed of densely packed nuclei (Fig. 1c, 5a-c). This differs from observations  
458 made in *O. bimaculoides*, where five gyri could be readily distinguished after hatching<sup>37</sup>. Similarly, for *O.*  
459 *vulgaris*, we could not distinguish the amacrine cells from the large efferent neurons based on nuclear  
460 size. However, based on the widespread expression of these marker genes (*arx*, *camkII*, *tmtc4*)  
461 throughout the vl (Fig. 5a) and *vacht* expression, we could identify the VL cells as the cholinergic  
462 amacrine cells described in the adult brain<sup>38</sup>. Gene ontology enrichment analysis for this cell type showed  
463 that cognition, learning, and learning or memory are the top three most enriched biological processes.  
464 This supports the function of the vl as the structure contributing to associative processing and learning  
465 and memory in the octopus brain<sup>39</sup>. Regarding the molecular profile of these cells (Fig. 5d), genes  
466 involved in long term potentiation and memory formation (e.g., *calmodulin*, *camkII*, *rut*) were highly  
467 expressed. Common marker genes identifying the mushroom body in the fly, such as Dunce (*dnc*) and  
468 Leo (*pka-c*), were also enriched within VL cells<sup>40</sup>. Certain transcription factors (i.e. *mef2*, *mblk*, *dsp1* and  
469 *zfhx4*) were present in both VL and Kenyon cells (logfc.threshold > 0.25), but there was no significant  
470 enrichment for typical Kenyon cell transcription factors such as *ey*, *fru* and *datf*<sup>33,41</sup>.

471

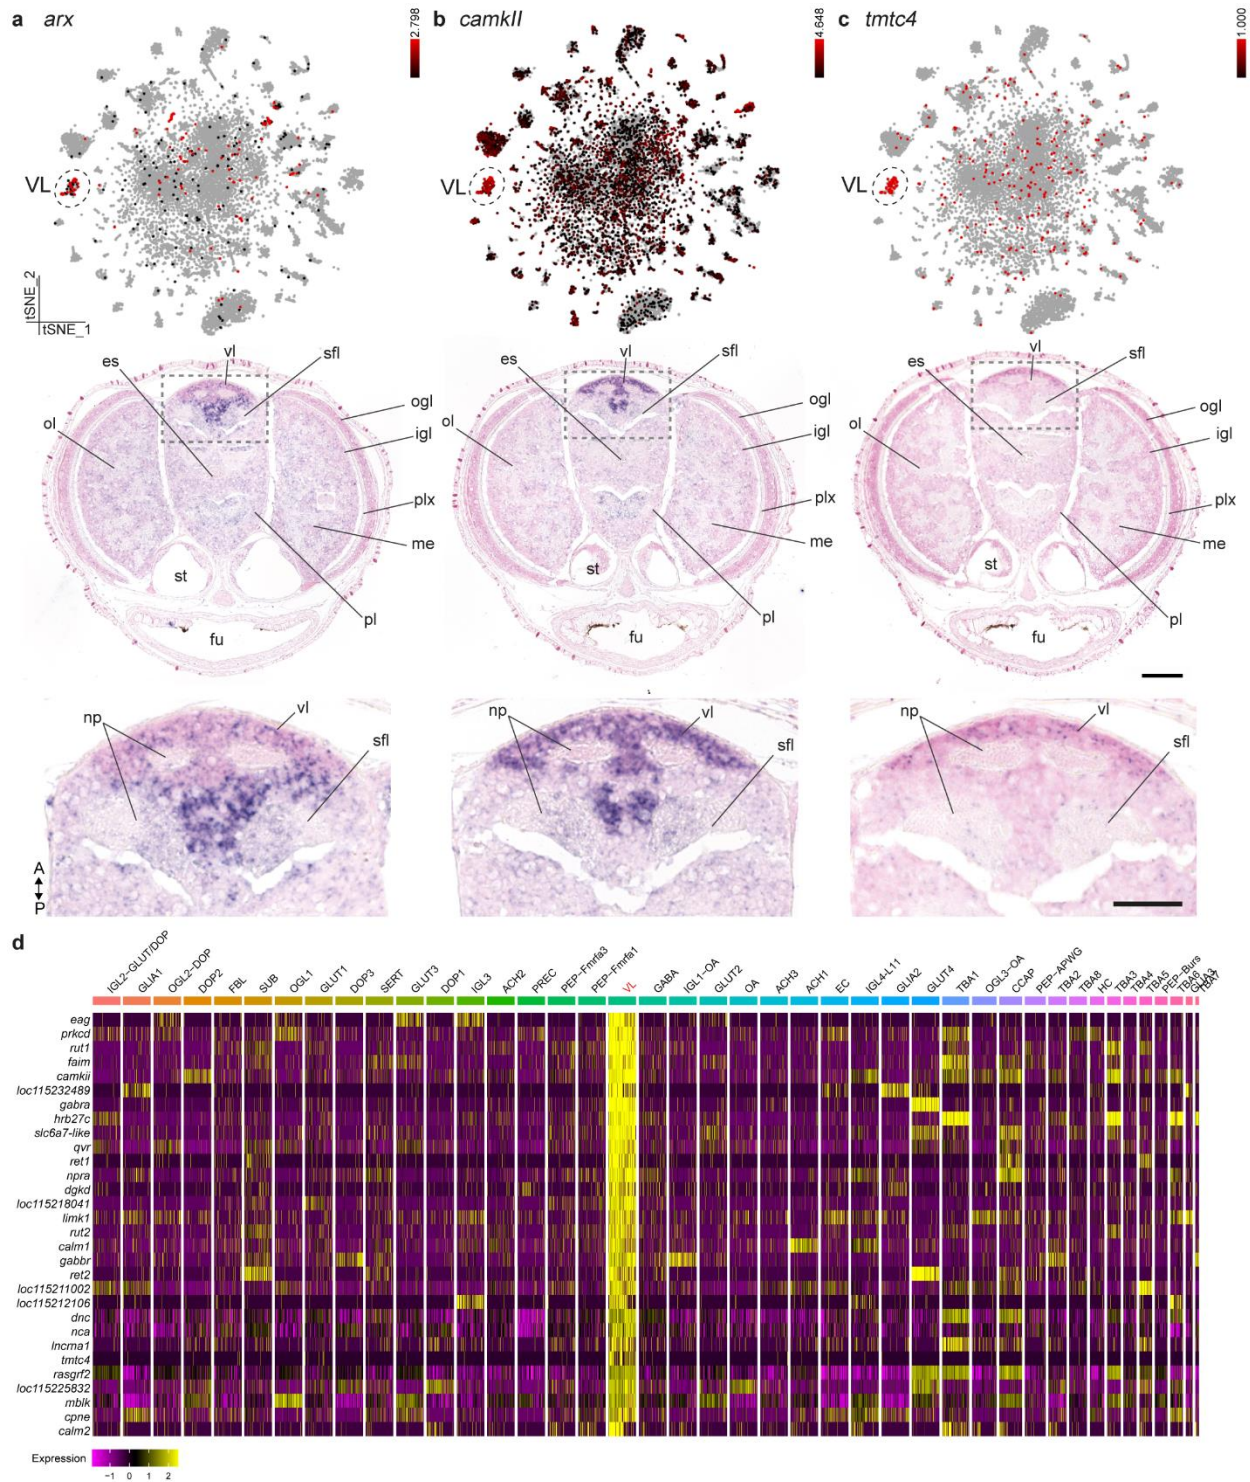

472 **Fig. 5 The molecular profile of the vertical lobe cells.** **a** *Aristaless* (*arx*) expression is limited to the vertical (vl) and the superior  
 473 frontal lobe (sfl). **b** *Ca* 2+ /Calmodulin-Dependent Protein Kinase II (*camkII*) expression can be observed mostly in the vl and less  
 474 within the sfl. **c** Transmembrane O-Mannosyltransferase Targeting Cadherins 4 (*tmtc4*) is uniquely expressed within the most  
 475 anterior part of the vl. t-SNE plots for *arx*, *camkII* and *tmtc4* are shown in a, b, c together with their respective *in situ* hybridization. **d**  
 476 Top 30 genes with the highest fold change for the vertical lobe cells (VL). Scale bars are 100  $\mu$ m for the overview images, 50  $\mu$ m for  
 477 the magnifications. es, esophagus; fu, funnel; igl, inner granular layer; np, neuropil; me, medulla; ogl, outer granular layer; ol, optic  
 478 lobe; pl, pedal lobe; plx, plexiform layer; sfl, superior frontal lobe; st, statocysts; vl, vertical lobe.

## 479 Non-neuronal cell types

480 In a previous study, we identified the lateral lips as the neurogenic niche outside of the developing  
481 octopus brain<sup>18</sup>. The lateral lips are anatomically very closely connected with the central brain through the  
482 anterior and posterior transition zones. We could retrieve limited expression of previously identified  
483 transcription factors (*ascl1* and *neurod*), which we assumed were lateral lip/transition zone cells (Fig. S6).  
484 These precursors (PREC) highly expressed markers related to pluripotency, embryonic stem cells and the  
485 npBAF complex. Genes such as *inism2*, *root* and a possible orthologue for *mki67* were highly expressed  
486 within the precursors. The majority of precursor cells were postmitotic (*neurod+*) but a smaller population  
487 were still progenitor-like (*ascl1+*) (Fig. S6b). Common markers for S and G2/M phase were highly  
488 expressed in this cluster (Fig. S6c). At this stage, we could only find a minor population of proliferating  
489 cells (PHH3+), within the remnants of the lateral lips but not in the brain (Fig. S6d). Interestingly, these  
490 precursors were found to be related to mouse oligodendrocytes (Fig. 4a). As invertebrates do not  
491 myelinate neurons, a myelinating cell type does not exist. The resemblance with mouse oligodendrocytes  
492 might point to a common ancestral cell type that has neural progenitor features. While this paralarval  
493 brain represents the end point of embryonic neurogenesis, a secondary phase of neurogenesis during a  
494 later stage is likely to occur.

495 Contrary to most invertebrates, the octopus has a closed circulatory system and a hemolymph-brain  
496 barrier<sup>42–44</sup>. At this developmental stage, we expected a certain degree of cerebral vasculature<sup>45</sup>. We  
497 found octopus endothelial cells (EC) that highly expressed conserved markers, more specifically *vegfr*,  
498 *hlx*, *meox2*, *troponin T* and *notch*. Furthermore, we identified a small population of hemocytes (HC) within  
499 the dataset (*vegfr+*, *vwf+*). We also observed high *vegfr* expression underneath the epidermis in a  
500 punctuate pattern (Fig. S7). The resemblance of the octopus hemocytes with mouse microglia, which are  
501 derived from the blood lineage, was not unexpected (Fig. 4a).

502 Fibroblast-like cells (FBL) were annotated based on their expression of collagens, troponin, tropomyosins  
503 and ribosomal genes. Intriguingly, hierarchical clustering of cell types illustrates similarities with precursor  
504 cells and neurons (Fig. 1f). Octopus fibroblasts were organized in a layer that surrounds the brain (Fig.  
505 S7). As this cell type produced extracellular matrix, it might contribute to forming the protective structure

506 surrounding the central brain. Only half of the FBL expressed *troponin T* marking fully differentiated cells.  
507 Octopus FBL mapped to mouse endothelial cells, possibly owing to their common mesodermal origin (Fig.  
508 4a).

### 509 Homeobox genes are defining transcription factors for cell type identity

510 To investigate which transcription factors (TF) determine cell type identity, we calculated the tissue  
511 specificity index (tau) for all TF, which resulted in a ranked list. Then, we tested which TF family was the  
512 most cell type specific by performing a gene set enrichment analysis for the different TF families within  
513 the ranked list. We found that Homeobox TF are the most linked with cell type identity, followed by basic  
514 helix-loop-helix TF and ZnF, which massively expanded in coleoid cephalopods (Fig. 6a). Combinations  
515 of Homeobox TF do seem to be uniquely expressed in certain cell types (Fig. 6b). For example, we  
516 observed conserved expression of *aristaless (arx)* in amacrine interneurons within the vertical lobe (Fig.  
517 5a) and *hlx* and *meox2* in endothelial cells. Moreover, we mapped *vsx2* to cells in the medulla and *prd12*<sup>46</sup>  
518 to the sub-vertical lobe (Fig. S8).

### 519 Genetic novelty drives cellular diversification

520 Our data showed a large diversity in brain cell types, which is expected in an animal with a rich cognitive  
521 behavioral pattern. Previous genomic studies indicated that coleoid cephalopods, including *O.*  
522 *bimaculoides* and *O. vulgaris*, specifically expanded certain gene families, leading to novel octopus  
523 genes<sup>12,47</sup>. We investigated whether these unique octopus genes might have driven the appearance of  
524 novel cell types. We hypothesized that recently expanded gene families, such as PCDH, ZnF, and GPCR,  
525 might convey the potential to diversify and develop octopus-specific cell types. For this purpose, we  
526 investigated whether genes of these families are enriched in certain cell types, which could be considered  
527 as a metric for novelty. In particular, PCDH were often annotated as marker genes (logfc.threshold >  
528 0.25) for specific cell types. We found that some PCDH were ubiquitously expressed, while others were  
529 enriched in specific cell types (Fig. 7a). Important to note is that these PCDH were not homologous to  
530 vertebrate PCDH. *pcdh15* (Fig. 7b) was highly expressed within serotonergic neurons (SERT), whereas  
531 *pcdh24* (Fig. 7c) was enriched in a subset of octopaminergic neurons in the ogl (OGL3-OA). Although  
532 distinct subsets of GPCR and PCDH were highly expressed in specific neuronal cell types, the ZnF were

533 enriched in the precursor cells (Fig. S9). This enrichment was statistically significant ( $p\text{-adj}<0.05$ ) based  
 534 on Fisher's exact tests (bonferroni corrected) (see also Fig. S9b).

**a**

| TF family | ES    | NES   | p-value | fdr  | gene set size |
|-----------|-------|-------|---------|------|---------------|
| Homeobox  | 0.53  | 3.45  | 0       | 0    | 81            |
| bHLH      | 0.36  | 2.32  | 0       | 0    | 57            |
| zf-C2H2   | 0.12  | 1.20  | 0.21    | 0.32 | 213           |
| HMG       | 0.08  | 0.45  | 1.00    | 1.00 | 45            |
| THR-like  | -0.22 | -0.98 | 0.54    | 0.47 | 18            |
| bZIP      | -0.20 | -1.20 | 0.24    | 0.34 | 27            |
| MYB       | -0.36 | -2.09 | 0       | 0    | 21            |

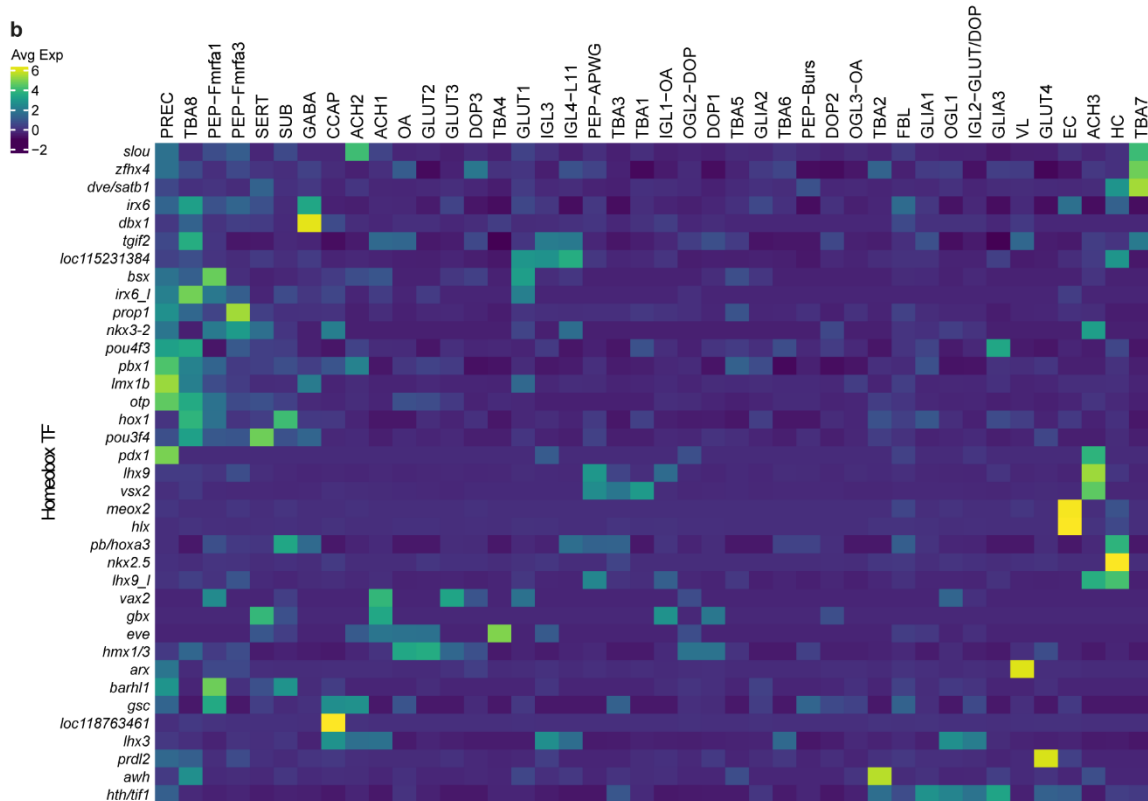

535  
 536 **Fig. 6 Cell type specificity and transcription factors.** **a** Enrichment scores for the different TF within the ranked list based on tau.  
 537 ES, Enrichment Score; NES, Normalized Enrichment Score; fdr, false-discovery rate. **b** Heatmap of highly variable Homeobox  
 538 transcription factors, averaged per cell type and scaled.



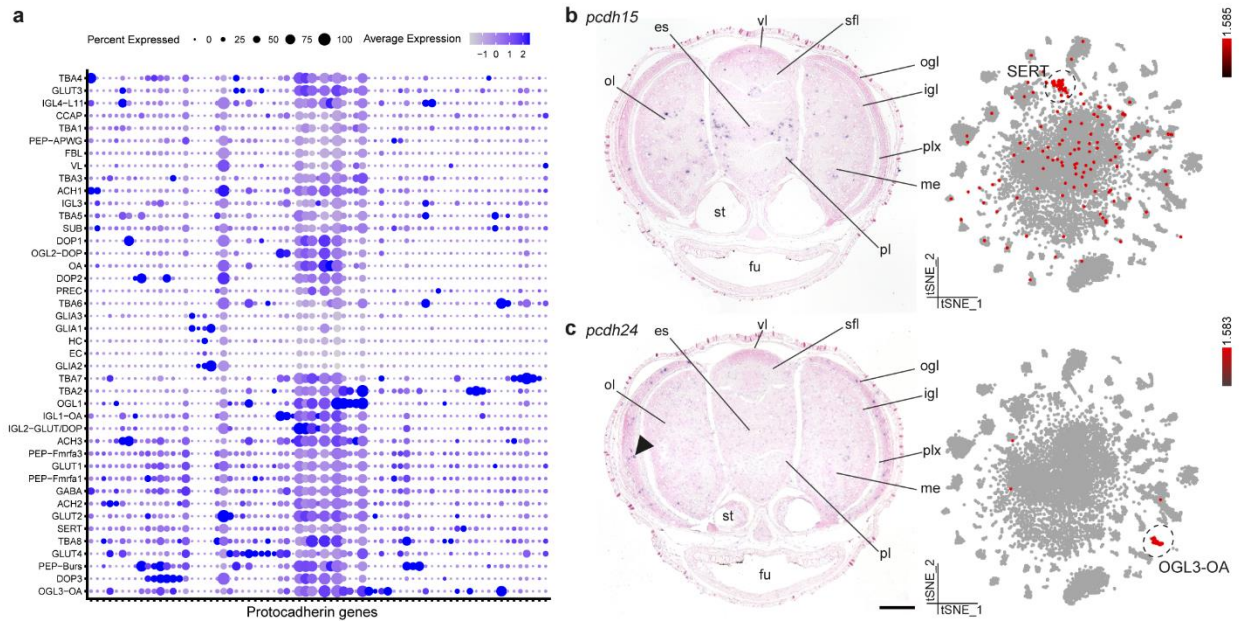

539  
 540 **Fig. 7 Protocadherin gene family expansion underlies cellular diversification.** **a** Dotplot of highly variable protocadherin genes  
 541 across all cell types. **b** Protocadherin 15 (*pcdh15*) is expressed within serotonergic neurons (SERT). **c** Protocadherin 24 (*pcdh24*) is  
 542 expressed within the octopaminergic neurons localized in the outer granular layer (OGL3-OA), positive signal is indicated with a  
 543 black arrow. Scale bars represent 100  $\mu$ m. es, esophagus; fu, funnel; igl, inner granular layer; me, medulla; ogl, outer granular layer;  
 544 ol, optic lobe; pl, pedal lobe; plx, plexiform layer; sfl, superior frontal lobe; st, statocysts; vl, vertical lobe.

545

## 546 Discussion

547 Here, we report for the first time on cell type diversity in a mollusk. Although single-cell transcriptomic  
 548 studies are gaining popularity, Lophotrochozoans have so far been understudied aside from *Platynereis*  
 549 *dumerilii*<sup>48</sup>. In this study, we overcame several technical hurdles when applying novel technologies to a  
 550 non-model organism such as *O. vulgaris*. Firstly, an evidence-guided approach to improve the genome  
 551 annotation by using full-length RNA sequencing methods led to more complete gene models, including a  
 552 better annotation of 3'UTRs and annotation of novel genes. This significantly improved mapping statistics  
 553 and led to more reliable results and a higher number of estimated cells. Even in established model  
 554 organisms such as zebrafish, a similar approach proved valuable and led to the identification of additional  
 555 cell types<sup>49</sup>. We believe that this method and resource (Data S1) will aid other researchers in mapping  
 556 bulk and scRNA-seq datasets. Secondly, cell type annotation without a priori knowledge on the number or  
 557 molecular markers of cell types is not trivial. We propose that using cluster stability in order to obtain  
 558 biologically relevant cell types<sup>29</sup> is a reliable first way of cell type discovery. Lastly, by using a dual

559 approach in sequencing both cells and nuclei, we have overcome any technical bias associated with each  
560 sequencing technology.

561 We were able to sequence around 17,000 single-cell expression profiles, which is roughly 9 percent of  
562 the total number of cells in the paralarval brain<sup>20</sup>. As a consequence, our data is unlikely to reveal every  
563 cell type present. Indeed, many neurons could not be assigned to stable clusters (Fig. 1e). Similar  
564 observations were made in adult fly brain scRNA-seq data<sup>33,50</sup>. We therefore hypothesize that the cell  
565 type diversity in these invertebrate brains is extensive and that the central cluster represents less  
566 prevalent cell types. Considering that this is a paralarval brain, of which the number of cells still needs to  
567 multiply a thousand-fold to reach adulthood<sup>5,20</sup>, the diversity of mature neuron types is impressive. Aside  
568 from a relatively small precursor population (~1%), this brain seems fully differentiated. Interestingly, a  
569 prominent dual-transmitter cell type was identified (~5% is both glutamatergic and dopaminergic).  
570 Similarly, in the larval fly brain 9% of neurons co-expressed markers for glutamatergic and aminergic  
571 neurons<sup>36</sup>, while this cell type was less prevalent in the adult fly brain<sup>51</sup>. These dual-transmitter neurons  
572 may play a role during development to refine the neural circuit and we postulate that this cell type might  
573 be unique to the optic lobe at this developmental stage.

574 The organization of the cell types within the inner and outer granular layer (igl and ogl) of the optic lobe is  
575 reminiscent of the very well characterized vertebrate retina<sup>52,53</sup>. We found that the ogl consists of at least  
576 three molecularly distinct cell types, which seem to be organized in sub-layers (Fig. S10). We identified  
577 numerous small cell bodies with a slight increase in size towards the exterior of the layer, which are most  
578 likely all amacrine neurons<sup>53</sup>. Although previous studies have identified eight different layers within the  
579 plexiform zone<sup>53</sup>, no lamination had been described so far within the igl. A laminated neuronal  
580 architecture coordinates visual information capture in vertebrates, in the layered retina, as well as visual  
581 information processing in invertebrates, in the optic lobe medulla in the fly. In these structures, layers are  
582 formed during development in a temporally controlled manner<sup>54,55</sup>. In a previous study, we have shown  
583 that the cells from the hatchling optic lobe originate from the lateral lips, which are spatially patterned<sup>18</sup>.  
584 Cells from the dorsal-anterior quadrant predominantly generate cells destined for the optic lobe cortex,  
585 whereas cells originating from the posterior lateral lip migrate towards the medulla. In addition to spatial

586 patterning, future research is required to confirm whether these cells are also temporally patterned in  
587 order to generate the distinct layers within the optic lobe cortex.

588 While in mammals there are generally more glial cells in the brain than neurons, the opposite is true for  
589 most invertebrate species<sup>56</sup>. Considering that this is an unmyelinated and large central nervous system,  
590 cephalopods evolved alternative strategies to ensure conduction speed, e.g. the famous giant axon in  
591 squids<sup>57</sup>. Aside from myelin producing glia, wrapping glia that insulate axons can contribute to increased  
592 signaling speed<sup>58</sup>. Based on the location of glial cells within the octopus brain, we can differentiate  
593 between neuropil glia, presumably involved in axon wrapping, and infiltrating glia. The largest glial cluster  
594 identified (GLIA1) mainly expresses *gat*, which is also found in neuropil glia or astrocytes in the fly brain<sup>36</sup>.  
595 Whereas in the fly a distinctive glial type is identified at the borders of the neuropil, which is exclusively  
596 responsible for ensheathing the neuropil<sup>59</sup>, we could not identify a similar cell type based on the  
597 expression patterns of glial marker genes. The infiltrating glia likely provide support (both structural and  
598 metabolic) and might be involved in neuronal modulation as has been described for vertebrate  
599 astrocytes<sup>60</sup>, since they are in close proximity to the neuronal cell bodies. Whether this glial subtype  
600 correlates with GLIA2 cells is unknown at this point. SAMap analysis revealed a common glial gene  
601 expression signature between members of Lophotrochozoa, Ecdysozoa and chordates, suggesting that  
602 those genes reflect an ancestral bilaterian expression signature.

603 Conservation of gene expression profiles might point towards a common origin (out of an ancestral cell  
604 type) or a common function (by means of convergent evolution). In essence, SAMap does not make that  
605 distinction. Evolution of novel cell types from a common ancestor assumes the evolution or diversification  
606 of combinations of transcription factors or selectors<sup>61,62</sup>. Octopus vertical lobe cells were found to share  
607 expression of genes related to learning and memory in *Drosophila* Kenyon cells. The vertical lobe (vl) is  
608 considered to be the learning and memory center in octopus<sup>38,39,63</sup>. After ablation experiments of the vl,  
609 memory formation was found to be impaired<sup>39</sup>. Based on its 'fan-out fan-in' matrix-like synaptic network,  
610 its folded anatomy, small interneurons and the existence of LTP, this structure is possibly functionally  
611 homologous to a mushroom body<sup>9</sup>. Mushroom body-like structures have been identified in other  
612 lophotrochozoans such as *Platynereis* and a common origin has been suggested<sup>64,65</sup>. However, the

613 overlapping expressed genes in octopus VL and *Drosophila* Kenyon cells did not contain many  
614 transcription factors specific to Kenyon cells. This suggest that different transcriptional programs have  
615 evolved to generate neurons involved in memory formation, and that the transcription factor code is more  
616 flexible than the underlying effector genes.

617 On the other hand, the VL cells highly expressed *arx*, which is a central transcription factor demarcating  
618 the early mushroom body in the annelid *Platynereis*<sup>64</sup>. Other transcription factors that have been  
619 commonly found in anterior brain structures in *Platynereis* and vertebrates, such as *pax6*, *emx2*, *lhx6*,  
620 *nkx2-1* or *dlx*, however, were not found to be expressed in the VL cells<sup>66</sup>. Similar to the *Drosophila*  
621 Kenyon cells, octopus VL cells are mainly cholinergic<sup>38,67</sup>. Future cell type atlases on a more diverse  
622 range of organisms might clarify whether these cell types share a common origin. The molecular blueprint  
623 of the VL cells could shed light on universal mechanisms regarding learning and memory. A direct link  
624 between *camkII* and memory storage has only recently been established in rats<sup>68</sup>. Similarly, octopus  
625 *camkII* signaling might also underlie the neuronal plasticity observed in the vl.

626 Transcription factors are considered major drivers of cell type identity. Recent studies in *C. elegans*<sup>69</sup> and  
627 in fly motoneurons<sup>70</sup> suggest that unique combinations of homeobox transcription factors are responsible  
628 for maintaining cell type identity. Our data show that that also in *O. vulgaris*, homeobox transcription  
629 factors are the most cell type specific. Together, our data suggest that the concept of a cell type  
630 determining homeobox code is translatable to organisms with increased neuronal cell type diversity such  
631 as *O. vulgaris*.

632 Expansion of ZnF, GPCR and PCDH gene families might have offered a way to develop novel cell types.  
633 Our data show that specific combinations of ZnF, GPCR and PCDH genes were expressed in particular  
634 clusters. By neo-functionalization of species-specific genes, unique cell types can arise. Indeed, novel  
635 genes have been found enriched in species-specific cell types<sup>71</sup>. The cell type-specific combinations of  
636 PCDH could have aided the development of the complex octopus nervous system<sup>47</sup>. Similar to non-  
637 clustered PCDH in vertebrates<sup>72</sup>, octopus PCDH combinations could provide a way to differentially sort  
638 out cell populations based on the adhesive character of PCDH. ZnF of the C2H2 type are amongst the  
639 most common DNA binding proteins in eukaryotes. ZnF were enriched in neuronal precursors, pointing to

640 a potential role in cell fate specification and differentiation. This corroborates the finding that ZnF genes  
641 are more highly expressed during embryogenesis in *O. bimaculoides*<sup>12</sup>.

642 It remains an open question whether larger nervous systems also have more cell types or whether they  
643 have an increased cell number per cell type. Here we provide the first view on cell type diversity of a  
644 highly complex invertebrate brain, which we have only begun to explore. This dataset provides a starting  
645 point for comparative studies with the adult octopus brain, which might then yield informative answers  
646 linking brain complexity and cell type diversity. More cell numbers of certain cell types might increase the  
647 computational power of the brain, which could explain the higher cognitive function of the octopus brain.

## 648 [Data Availability](#)

649 All single cell and nuclei data are available online at [https://scope.aertslab.org/#/Octopus\\_Brain/](https://scope.aertslab.org/#/Octopus_Brain/). SCoPe  
650 allows for easy simultaneous visualization of the expression of three genes while toggling between  
651 different embeddings. Marker gene lists can be downloaded here for different clusterings (Seurat  
652 clustering and annotated clustering). Different metrics can be visualized such as the nCount,  
653 percent.mito, nFeature and whether these originated from cells or nuclei (batch). The scRNA-seq data  
654 and snRNA-seq data have been deposited in GEO under accession code GSE193622.

## 655 [Acknowledgements](#)

656 The authors would like to thank Eduardo Almansa for his continuous support in providing us with octopus  
657 eggs and for sharing his expertise in octopus culture. Moreover, we want to thank Tania Aerts, Luca  
658 Masin and Ayana Rajagopal for critical discussions and Nikolai Hecker and Seppe De Winter for their  
659 help with bioinformatic analysis. We would also like to acknowledge our master thesis students Swell  
660 Sieben for help during dissections and Sofia Maccuro and Dries Janssen for cloning. All computational  
661 analyses were performed at the Vlaams Supercomputer Center (VSC). This work was supported by KU  
662 Leuven (C14/21/065 to E.S., ID-N/20/007 to E.S., S.A., C14/18/092 to S.A.), Stazione Zoologica Anton  
663 Dohrn (R.S., G.P., G.F.) and FWO (A.D.; SB/1S19517N and A.M.E.; FR/11D4120N).

664

## 665 Author contributions

666 R.S., S.P., A.M.E. and A.D. performed the experiments. R.S., G.Z., G.H., K.S., A.M.E. and E.S. analyzed  
667 and interpreted the data. S.A., G.F. and E.S. designed and supervised the study. R.S. and E.S. wrote the  
668 original draft of the manuscript. All authors contributed to review and editing.

## 669 Competing interests

670 The authors declare no competing interests.

## 671 References

- 672 1. Finn, J. K., Tregenza, T. & Norman, M. D. Defensive tool use in a coconut-carrying octopus. *Curr.*  
673 *Biol.* **19**, 1069–1070 (2009).
- 674 2. Fiorito, G. & Scotto, P. Observational Learning in *Octopus vulgaris*. *Science (80-. )*. **256**, 545–547  
675 (1992).
- 676 3. Schnell, A. K., Amodio, P., Boeckle, M. & Clayton, N. S. How intelligent is a cephalopod? Lessons  
677 from comparative cognition. *Biol. Rev.* **96**, 162–178 (2021).
- 678 4. Amodio, P. *et al.* Grow Smart and Die Young: Why Did Cephalopods Evolve Intelligence? *Trends*  
679 *Ecol. Evol.* 1–12 (2019). doi:10.1016/j.tree.2018.10.010
- 680 5. Young, J. Z. The number and sizes of nerve cells in *Octopus*. *Proc. Zool. Soc. London* **140**, 229–  
681 254 (1963).
- 682 6. Young, J. Z. The anatomy of the nervous system of *Octopus vulgaris*. **8** (1971).
- 683 7. Roth, G. Convergent evolution of complex brains and high intelligence. *Philos. Trans. R. Soc.*  
684 *London. Ser. B* **370**, (2015).
- 685 8. Edelman, D. B. & Seth, A. K. Animal consciousness : a synthetic approach. *Trends Neurosci.* **32**,  
686 (2009).
- 687 9. Hochner, B. Functional and comparative assessments of the octopus learning and memory  
688 system. *Front. Biosci.* 764–771 (2010).
- 689 10. Shigeno, S., Andrews, P. L. R., Ponte, G. & Fiorito, G. Cephalopod Brains : An Overview of  
690 Current Knowledge to Facilitate Comparison With Vertebrates. *Front. Physiol.* **9**, 1–16 (2018).
- 691 11. Herculano-Houzel, S., Collins, C., Wong, P. & Kaas, J. Cellular scaling rules for primate brains.  
692 *Pnas* **104**, 290 (2007).
- 693 12. Albertin, C. B. *et al.* The octopus genome and the evolution of cephalopod neural and  
694 morphological novelties. *Nature* **524**, 220–225 (2015).
- 695 13. Al-Naama, N., Mackeh, R. & Kino, T. C2H2-Type Zinc Finger Proteins in Brain Development,  
696 Neurodevelopmental, and Other Neuropsychiatric Disorders: Systematic Literature-Based  
697 Analysis. *Front. Neurol.* **11**, 1–14 (2020).
- 698 14. Pancho, A., Aerts, T., Mitsogiannis, M. D. & Seuntjens, E. Protocadherins at the Crossroad of  
699 Signaling Pathways. *Front. Mol. Neurosci.* **13**, 1–28 (2020).
- 700 15. Sando, R., Jiang, X. & Südhof, T. C. Latrophilin GPCRs direct synapse specificity by coincident  
701 binding of FLRTs and teneurins. *Science (80-. )*. **363**, (2019).

- 702 16. Deryckere, A., Styfhals, R., Vidal, E. A. G., Almansa, E. & Seuntjens, E. A practical staging atlas  
703 to study embryonic development of *Octopus vulgaris* under controlled laboratory conditions. *BMC*  
704 *Dev. Biol.* **20**, (2020).
- 705 17. Mangold, K. *Octopus vulgaris In: Cephalopod life cycles. Volume I: species accounts.* (Academic  
706 Press, 1983).
- 707 18. Deryckere, A., Styfhals, R., Elagoz, A. M., Maes, G. E. & Seuntjens, E. Identification of neural  
708 progenitor cells and their progeny reveals long distance migration in the developing octopus brain.  
709 *Elife* (2021).
- 710 19. Frösh, D. Quantitative untersuchungen am zentralnervensystem der schlüpfstadien von zehn  
711 mediterranen cephalopodenarte. *Rev. Suisse Zool.* **17**, 1069–1122 (1971).
- 712 20. Giuditta, A., Libonati, M., Packard, A. & Prozzo, N. Nuclear counts in the brain lobes of *Octopus*  
713 *vulgaris* as a function of body size. *Brain Res.* **25**, 55–62 (1971).
- 714 21. Li, F. *et al.* Chromosome-level genome assembly of the East Asian common octopus (*Octopus*  
715 *sinensis*) using PacBio sequencing and Hi-C technology. *Mol. Ecol. Resour.* **20**, 1572–1582  
716 (2020).
- 717 22. Zolotarov, G. *et al.* MicroRNAs are deeply linked to the emergence of morphological and  
718 behavioral complexity in animals. *In preparation.* (2022).
- 719 23. García-Fernández, P. *et al.* Global impact of diet and temperature over aquaculture of *Octopus*  
720 *vulgaris* paralarvae from a transcriptomic approach. *Sci. Rep.* **9**, 10312 (2019).
- 721 24. Huerta-Cepas, J. *et al.* EggNOG 5.0: A hierarchical, functionally and phylogenetically annotated  
722 orthology resource based on 5090 organisms and 2502 viruses. *Nucleic Acids Res.* **47**, D309–  
723 D314 (2019).
- 724 25. Fiorito, G. *et al.* Guidelines for the Care and Welfare of Cephalopods in Research –A consensus  
725 based on an initiative by CephRes, FELASA and the Boyd Group United States of America. *Lab.*  
726 *Anim.* **49**, 1–90 (2015).
- 727 26. Kuehn, E. *et al.* Segment number threshold determines juvenile onset of germline cluster  
728 expansion in *Platynereis dumerilii*. *J. Exp. Zool. Part B Mol. Dev. Evol.* (2021).  
729 doi:10.1002/jez.b.23100
- 730 27. Elagoz, A. M. *et al.* Optimization of Whole Mount RNA multiplexed *in situ* Hybridization Chain  
731 Reaction with Immunohistochemistry, Clearing and Imaging to visualize octopus neurogenesis. *In*  
732 *preparation.* (2022).
- 733 28. Stuart, T. *et al.* Comprehensive Integration of Single-Cell Data. *Cell* **177**, 1888-1902.e21 (2019).
- 734 29. Tang, M. *et al.* Evaluating single-cell cluster stability using the Jaccard similarity. *Bioinformatics*  
735 (2020). doi:10.12688/f1000research.20843.1
- 736 30. Hu, H. *et al.* AnimalTFDB 3.0: A comprehensive resource for annotation and prediction of animal  
737 transcription factors. *Nucleic Acids Res.* **47**, D33–D38 (2019).
- 738 31. Tarashansky, A. J. *et al.* Mapping single-cell atlases throughout Metazoa unravels cell type  
739 evolution. *Elife* 1–24 (2021).
- 740 32. Kleshchevnikov, V. *et al.* Comprehensive mapping of tissue cell architecture via integrated single  
741 cell and spatial transcriptomics. *bioRxiv* 2020.11.15.378125 (2020).
- 742 33. Davie, K. *et al.* A Single-Cell Transcriptome Atlas of the Aging *Drosophila* Brain. *Cell* **174**, 982-  
743 998.e20 (2018).
- 744 34. Zarrella, I. *et al.* The survey and reference assisted assembly of the *Octopus vulgaris* genome.

- 745            *Sci. Data* 1–8 (2019). doi:10.1038/s41597-019-0017-6
- 746    35.    Legnini, I., Alles, J., Karaiskos, N., Ayoub, S. & Rajewsky, N. FLAM-seq: full-length mRNA  
747            sequencing reveals principles of poly(A) tail length control. *Nat. Methods* **16**, 879–886 (2019).
- 748    36.    Avalos, C. B., Brugmann, R. & Sprecher, S. G. Single cell transcriptome atlas of the *Drosophila*  
749            larval brain. *Elife* **8**, 1–25 (2019).
- 750    37.    Shigeno, S. & Ragsdale, C. W. The gyri of the octopus vertical lobe have distinct neurochemical  
751            identities. *J. Comp. Neurol.* **523**, 1297–1317 (2015).
- 752    38.    Shomrat, T. *et al.* Alternative sites of synaptic plasticity in two homologous ‘fan-out fan-in’ learning  
753            and memory networks. *Curr. Biol.* **21**, 1773–1782 (2011).
- 754    39.    Boycott, B. B. & Young, J. Z. A Memory System in *Octopus vulgaris* Lamarck. *Proc. R. Soc. B*  
755            *Biol. Sci.* **143**, (1955).
- 756    40.    Kaneko, K., Suenami, S. & Kubo, T. Gene expression profiles and neural activities of Kenyon cell  
757            subtypes in the honeybee brain: identification of novel ‘middle-type’ Kenyon cells. *Zool. Lett.* **2**, 1–  
758            13 (2016).
- 759    41.    Jones, S. G., Nixon, K. C. J., Chubak, M. C. & Kramer, J. M. Mushroom Body Specific  
760            Transcriptome Analysis Reveals Dynamic Regulation of Learning and Memory Genes After  
761            Acquisition of Long-Term Courtship Memory in *Drosophila*. *G3 Genes, Genomes, Genet.* **8**,  
762            (2018).
- 763    42.    Bundgaard, M. & Abbott, N. J. Fine structure of the blood-brain interface in the cuttlefish *Sepia*  
764            *officinalis* (Mollusca, Cephalopoda). *J. Neurocytol.* **21**, 260–275 (1992).
- 765    43.    Schipp, R. The blood vessels of cephalopods. A comparative morphological and functional survey.  
766            *Experientia* **43**, 525–537 (1987).
- 767    44.    Budelmann, B. U. *The cephalopod nervous system: What evolution has made of the molluscan*  
768            *design.* **72**, (1995).
- 769    45.    Yoshida, M. A., Shigeno, S., Tsuneki, K. & Furuya, H. Squid vascular endothelial growth factor  
770            receptor: A shared molecular signature in the convergent evolution of closed circulatory systems.  
771            *Evol. Dev.* **12**, 25–33 (2010).
- 772    46.    Neal, S. *et al.* Co-option of the limb patterning program in cephalopod eye development. *BMC*  
773            *Biol.* **20**, 1–11 (2022).
- 774    47.    Styfhals, R. *et al.* In silico Identification and Expression of Protocadherin Gene Family in *Octopus*  
775            *vulgaris*. *Front. Physiol.* **9**, 1–8 (2019).
- 776    48.    Vergara, H. M. *et al.* Whole-body integration of gene expression and single-cell morphology. *Cell*  
777            **184**, 4819-4837.e22 (2021).
- 778    49.    Lawson, N. D. *et al.* An improved zebrafish transcriptome annotation for sensitive and  
779            comprehensive detection of cell type-specific genes. *Elife* **9**, 1–28 (2020).
- 780    50.    Bates, A. S., Janssens, J., Jefferis, G. S. & Aerts, S. Neuronal cell types in the fly : single-cell  
781            anatomy meets single-cell genomics. *Curr. Opin. Neurobiol.* **56**, 125–134 (2019).
- 782    51.    Brunet Avalos, C. & Sprecher, S. G. Single-Cell Transcriptomic Reveals Dual and Multi-  
783            Transmitter Use in Neurons Across Metazoans. *Front. Mol. Neurosci.* **14**, (2021).
- 784    52.    Cajal, S. R. *Contribucion al conocimiento de la retina y centros de los cefalopodos.* (Union  
785            internacional de ciencias biologicas comité espanol, 1930).
- 786    53.    Young, J. Z. The optic lobes of *Octopus vulgaris*. **325**, 379–430 (1962).



- 787 54. Nériec, N. & Desplan, C. From The Eye To The Brain: Development Of The *Drosophila* Visual  
788 System. *Physiol. Behav.* **176**, 139–148 (2016).
- 789 55. Amini, R., Rocha-Martins, M. & Norden, C. Neuronal migration and lamination in the vertebrate  
790 retina. *Front. Neurosci.* **11**, 1–16 (2018).
- 791 56. Verkhratsky, A. & Butt, A. The History of the Decline and Fall of the Glial Numbers Legend.  
792 *Neuroglia* **1**, 188–192 (2018).
- 793 57. Hodgkin, A. L. & Huxley, A. F. A quantitative description of membrane current and its application  
794 to conduction and excitation in nerve. *J. Physiol.* **117**, 500–544 (1952).
- 795 58. Kottmeier, R. *et al.* Wrapping glia regulates neuronal signaling speed and precision in the  
796 peripheral nervous system of *Drosophila*. *Nat. Commun.* 1–17 (2020). doi:10.1038/s41467-020-  
797 18291-1
- 798 59. Yildirim, K., Petri, J., Kottmeier, R. & Klämbt, C. *Drosophila* glia: Few cell types and many  
799 conserved functions. *Glia* **67**, 5–26 (2019).
- 800 60. Araque, A., Parpura, V., Sanzgiri, R. P. & Haydon, P. G. Tripartite synapses : glia , the  
801 unacknowledged partner. *TINS* **22**, (1999).
- 802 61. Arendt, D., Bertucci, P. Y., Achim, K. & Musser, J. M. Evolution of neuronal types and families.  
803 *Curr. Opin. Neurobiol.* **56**, 144–152 (2019).
- 804 62. Hobert, O. Terminal Selectors of Neuronal Identity. in *Essays on Developmental Biology, Part A*  
805 (ed. Wassarman, P. M.) **116**, 455–475 (Elsevier Inc., 2016).
- 806 63. Turchetti-Maia, A., Shomrat, T. & Hochner, B. The Vertical Lobe of Cephalopods—A Brain  
807 Structure Ideal for Exploring the Mechanisms of Complex Forms of Learning and Memory. **1**, 1–27  
808 (2017).
- 809 64. Tomer, R., Denes, A. S., Tessmar-Raible, K. & Arendt, D. Profiling by Image Registration Reveals  
810 Common Origin of Annelid Mushroom Bodies and Vertebrate Pallium. *Cell* **142**, 800–809 (2010).
- 811 65. Wolff, G. H. & Strausfeld, N. J. Genealogical correspondence of mushroom bodies across  
812 invertebrate phyla. *Curr. Biol.* **25**, 38–44 (2015).
- 813 66. Arendt, D., Urzainqui, I. Q. & Vergara, H. M. The conserved core of the nereid brain: Circular CNS,  
814 apical nervous system and *lhx6-arx-dlx* neurons. *Curr. Opin. Neurobiol.* **71**, 178–187 (2021).
- 815 67. Barnstedt, O. *et al.* Memory-Relevant Mushroom Body Output Synapses Are Cholinergic. *Neuron*  
816 **89**, 1237–1247 (2016).
- 817 68. Rossetti, T. *et al.* Memory Erasure Experiments Indicate a Critical Role of CaMKII in Memory  
818 Storage Memory Erasure Experiments Indicate a Critical Role of CaMKII in Memory Storage.  
819 *Neuron* **96**, 207-216.e2 (2017).
- 820 69. Reilly, M. B., Cros, C., Varol, E., Yemini, E. & Hobert, O. Unique homeobox codes delineate all the  
821 neuron classes of *C. elegans*. *Nature* **584**, 595–601 (2020).
- 822 70. Velten, J. *et al.* The molecular logic of synaptic wiring at the single cell level. *bioRxiv* (2020).  
823 doi:10.1101/2020.11.30.402057
- 824 71. Shafer, M. E. R., Sawh, A. N. & Schier, A. F. Gene family evolution underlies cell-type  
825 diversification in the hypothalamus of teleosts. *Nat. Ecol. Evol.* **6**, (2021).
- 826 72. Medina, A., Swain, R. K., Kuerner, K. M. & Steinbeisser, H. *Xenopus* paraxial protocadherin has  
827 signaling functions and is involved in tissue separation. *EMBO J.* **23**, 3249–3258 (2004).

828
